# Supplementary material for: Structural characterization and bonding properties of lithium naphthalene radical anion, [Li+(TMEDA)2][C10H8˙−], and lithium naphthalene dianion [(Li+TMEDA)2C10H8−2]
Source: Royal Society of Chemistry journal article supplement (doi:10.1039/b821119c), 2009-01-01
Supplement: b821119c.pdf [file b821119c.pdf]

**Structural Characterization and Bonding Properties of Lithium Naphthalene Radical Anion,  $[\text{Li}^+(\text{TMEDA})_2][\text{C}_{10}\text{H}_8^-]$ , and Lithium Naphthalene Dianion  $[(\text{Li}^+\text{TMEDA})_2\text{C}_{10}\text{H}_8^{-2}]$ .**

Albert Guijarro,\* Cristóbal Melero and Miguel Yus

Instituto de Síntesis Orgánica and Departamento de Química Orgánica, Facultad de Ciencias,  
Universidad de Alicante, Apdo. 99, 03080-Alicante, Spain  
Fax: (+34) 965-90-35-49. E-mail: [aguijarro@ua.es](mailto:aguijarro@ua.es), [yus@ua.es](mailto:yus@ua.es)

## Table of contents

**The Crystal Structures of the Solvent-Separated Lithium Naphthalene Radical Anion,  $[\text{Li}^+(\text{TMEDA})_2][\text{C}_{10}\text{H}_8^-]$ , and the Contact Ion Triple Lithium Naphthalene Dianion  $[(\text{Li}^+\text{TMEDA})_2\text{C}_{10}\text{H}_8^{-2}]$ .** ..... **Error! Bookmark not defined.**

Table of contents ..... 2

1. X-ray Analyses ..... 3
  - 1.1. General ..... 3
  - 1.2. Figure S1. Distance lithium-naphthalene anion plane in 1. .... 3
  - 1.3. Table S1. Comparison of bond distances of  $[\text{Li}+(\text{TMEDA})_2][\text{C}_{10}\text{H}_8^{\bullet-}]$  (1) with  $[\text{K}+(18\text{-crown-6}) (\text{THF})_2][\text{C}_{10}\text{H}_8^{\bullet-}]$  from ref. 5. .... 4
  - 1.4. Table S2. Comparison of bond distances of  $[\text{Li}+(\text{TMEDA})_2][\text{C}_{10}\text{H}_8^{\bullet-}]$  (1) with  $[\text{K}+([2,2,2]\text{-cryptand})][\text{C}_{10}\text{H}_8^{\bullet-}]$  from ref. 5. .... 4
  - 1.5. Table S3. Comparison of bond angles of  $[\text{Li}+(\text{TMEDA})_2][\text{C}_{10}\text{H}_8^{\bullet-}]$  (1) with  $[\text{K}+(18\text{-crown-6}) (\text{THF})_2][\text{C}_{10}\text{H}_8^{\bullet-}]$  from ref. 5. .... 5
  - 1.6. Table S4. Comparison of bond angles of  $[\text{Li}+(\text{TMEDA})_2][\text{C}_{10}\text{H}_8^{\bullet-}]$  (1) with  $[\text{K}+([2,2,2]\text{-cryptand})][\text{C}_{10}\text{H}_8^{\bullet-}]$  from ref. 5. .... 5
  - 1.7. Table S5. Comparison of bond distances of  $[(\text{Li}+\text{TMEDA})_2\text{C}_{10}\text{H}_8^{-2}]$  (2) with  $[(\text{Li}+\text{TMEDA})_2\text{C}_{10}\text{H}_8^{-2}]$  from ref. 8. .... 6
  - 1.8. Table S6. Comparison of bond angles of  $[(\text{Li}+\text{TMEDA})_2\text{C}_{10}\text{H}_8^{-2}]$  (2) with  $[(\text{Li}+\text{TMEDA})_2\text{C}_{10}\text{H}_8^{-2}]$  from ref. 8. .... 7
  - 1.9. Figure S2. Distance lithium-naphthalene dianion plane in 2. .... 7
2. Computational details ..... 8
  - 2.1. General ..... 8
  - 2.2. HF/6-31+G(d,p) ..... 9
  - 2.3. HF/6-311++G(d,p) ..... 12
  - 2.4. B3LYP/6-31+G(d,p) ..... 16
  - 2.5. B3LYP/6-311++G(d,p) ..... 19
  - 2.6. MP2/LANL2DZ ..... 23
  - 2.7. MP2/6-31+G(d) ..... 26
  - 2.8. MP2/6-311++G(d) ..... 30
3. References ..... 33

## 1. X-ray Analyses

### 1.1. General

Data collection was performed on a Bruker Smart CCD diffractometer, based on three  $\omega$ -scan runs (starting  $\omega=-34^\circ$ ) at values  $\omega=0^\circ, 120^\circ, 240^\circ$  with the detector at  $2\theta=-32^\circ$ . For each of these runs, 606 frames were collected at  $0.3^\circ$  intervals and 30 s per frame. An additional run  $\omega=0^\circ$  of 100 frames was collected to improve redundancy. The diffraction frames were integrated using the program SAINT<sup>1</sup> and the integrated intensities were corrected for Lorentz-polarisation effects with SADABS.<sup>2</sup> Structure **1** was solved by direct methods and refined to all 2057 unique  $F_o^2$  by full matrix least squares (SHELX97).<sup>3</sup> All the hydrogen atoms were placed at idealised positions and refined as rigid atoms. Final  $wR2=0.2348$  for all data and 127 parameters;  $R_1=0.0699$  for 1673  $F_o > 4\sigma(F_o)$ . Structure **2** was solved by direct methods and refined to all 3261 unique  $F_o^2$  by full matrix least squares (SHELX97). All the hydrogen atoms were placed at idealised positions and refined as rigid atoms. Final  $wR2=0.1363$  for all data and 158 parameters;  $R_1=0.0470$  for 2837  $F_o > 4\sigma(F_o)$ . For a complete list of the geometrical parameters as well as further refinement details, please consult the CCDC 695890 and CCDC 695891 cif files, which contain the supplementary crystallographic data for this paper. These data can be obtained free of charge from The Cambridge Crystallographic Data Centre via [www.ccdc.cam.ac.uk/data\\_request/cif](http://www.ccdc.cam.ac.uk/data_request/cif).

### 1.2. Figure S1. Distance lithium-naphthalene anion plane in **1**.

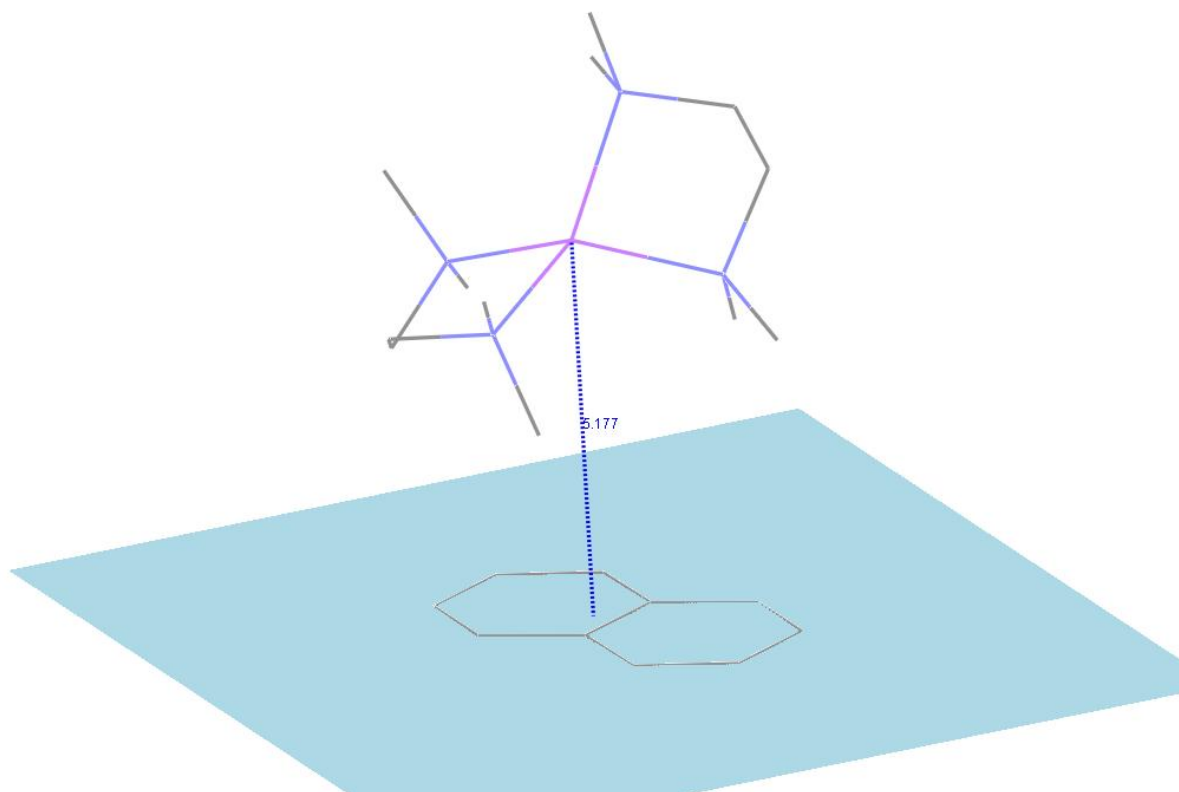

Figure S1. Calculated distance ( $5.18 \pm 0.01$  Å) between the lithium  $[\text{Li}^+(\text{TMEDA})_2]$ , and the least-squares mean plane of the anionic naphthalene moiety  $[\text{C}_{10}\text{H}_8^-]$  (blue plane), corresponding to **1**.

1.3. Table S1. Comparison of bond distances of  $[\text{Li}^+(\text{TMEDA})_2][\text{C}_{10}\text{H}_8^-]$  (**1**) with  $[\text{K}^+(\text{18-crown-6})(\text{THF})_2][\text{C}_{10}\text{H}_8^-]$  from ref. 5.

Table S1. Comparison of structures: bond distances of **1**

| Bond Distances for $[\text{Li}^+(\text{TMEDA})_2][\text{C}_{10}\text{H}_8^-]$ ( <b>1</b> ) (Angstroms) |         |        |        | Bond Distances for $[\text{K}^+(\text{18-crown-6})(\text{THF})_2][\text{C}_{10}\text{H}_8^-]$ (ref. 5) |        |                     |
|--------------------------------------------------------------------------------------------------------|---------|--------|--------|--------------------------------------------------------------------------------------------------------|--------|---------------------|
| Object 1                                                                                               | Object2 | Length | e.s.d. | Length                                                                                                 | e.s.d. | Absolute difference |
| C7                                                                                                     | C7      | 1.446  | 0.004  | 1.449                                                                                                  | 0.005  | 0.003               |
| C7                                                                                                     | C8      | 1.413  | 0.003  | 1.406                                                                                                  | 0.004  | 0.007               |
| C8                                                                                                     | C9      | 1.394  | 0.003  | 1.394                                                                                                  | 0.004  | 0                   |
| C9                                                                                                     | C10     | 1.384  | 0.004  | 1.384                                                                                                  | 0.004  | 0                   |
| C11                                                                                                    | C10     | 1.397  | 0.004  | 1.397                                                                                                  | 0.004  | 0                   |
| C11                                                                                                    | C7      | 1.414  | 0.003  | 1.412                                                                                                  | 0.004  | 0.002               |
| C8                                                                                                     | C7      | 1.413  | 0.003  | 1.406                                                                                                  | 0.004  | 0.007               |
| C8                                                                                                     | C9      | 1.394  | 0.003  | 1.394                                                                                                  | 0.004  | 0                   |
| C10                                                                                                    | C9      | 1.384  | 0.004  | 1.384                                                                                                  | 0.004  | 0                   |
| C11                                                                                                    | C10     | 1.397  | 0.004  | 1.397                                                                                                  | 0.004  | 0                   |
| C7                                                                                                     | C11     | 1.414  | 0.003  | 1.412                                                                                                  | 0.004  | 0.002               |
| Mean of e.s.d.:                                                                                        |         |        | 0.0034 | 0.0041                                                                                                 |        |                     |
| Mean of absolute differences:                                                                          |         |        |        |                                                                                                        |        | 0.00136             |

1.4. Table S2. Comparison of bond distances of  $[\text{Li}^+(\text{TMEDA})_2][\text{C}_{10}\text{H}_8^-]$  (**1**) with  $[\text{K}^+(\text{[2,2,2]-cryptand})][\text{C}_{10}\text{H}_8^-]$  from ref. 5.

Table S2. Comparison of structures: bond distances of **1**

| Bond Distances for $[\text{Li}^+(\text{TMEDA})_2][\text{C}_{10}\text{H}_8^-]$ ( <b>1</b> ) (Angstroms) |         |        |        | Bond Distances for $[\text{K}^+(\text{[2,2,2]-cryptand})][\text{C}_{10}\text{H}_8^-]$ |        |                     |
|--------------------------------------------------------------------------------------------------------|---------|--------|--------|---------------------------------------------------------------------------------------|--------|---------------------|
| Object 1                                                                                               | Object2 | Length | e.s.d. | Length                                                                                | e.s.d. | Absolute difference |
| C7                                                                                                     | C7      | 1.446  | 0.004  | 1.455                                                                                 | 0.004  | 0.009               |
| C7                                                                                                     | C8      | 1.413  | 0.003  | 1.409                                                                                 | 0.003  | 0.004               |
| C8                                                                                                     | C9      | 1.394  | 0.003  | 1.402                                                                                 | 0.003  | 0.008               |
| C9                                                                                                     | C10     | 1.384  | 0.004  | 1.373                                                                                 | 0.003  | 0.011               |
| C11                                                                                                    | C10     | 1.397  | 0.004  | 1.399                                                                                 | 0.003  | 0.002               |
| C11                                                                                                    | C7      | 1.414  | 0.003  | 1.41                                                                                  | 0.003  | 0.004               |
| C8                                                                                                     | C7      | 1.413  | 0.003  | 1.409                                                                                 | 0.003  | 0.004               |
| C8                                                                                                     | C9      | 1.394  | 0.003  | 1.402                                                                                 | 0.003  | 0.008               |
| C10                                                                                                    | C9      | 1.384  | 0.004  | 1.373                                                                                 | 0.003  | 0.011               |
| C11                                                                                                    | C10     | 1.397  | 0.004  | 1.399                                                                                 | 0.003  | 0.002               |
| C7                                                                                                     | C11     | 1.414  | 0.003  | 1.41                                                                                  | 0.003  | 0.004               |
| Mean of e.s.d.:                                                                                        |         |        | 0.0034 | 0.0031                                                                                |        |                     |

|                               |         |
|-------------------------------|---------|
| Mean of absolute differences: | 0.00609 |
|-------------------------------|---------|

1.5. Table S3. Comparison of bond angles of [Li+(TMEDA)<sub>2</sub>][C<sub>10</sub>H<sub>8</sub>•<sup>-</sup>] (**1**) with [K+(18-crown-6) (THF)<sub>2</sub>][C<sub>10</sub>H<sub>8</sub>•<sup>-</sup>] from ref. 5.

Table S3. Comparison of structures: bond angles of **1**

| Bond angles for [Li+(TMEDA) <sub>2</sub> ][C <sub>10</sub> H <sub>8</sub> • <sup>-</sup> ] ( <b>1</b> ) (°) |         |         |       |        | Bond angles for [K+(18-crown-6) (THF) <sub>2</sub> ][C <sub>10</sub> H <sub>8</sub> • <sup>-</sup> ] (ref. 5) (°) |        |                     |
|-------------------------------------------------------------------------------------------------------------|---------|---------|-------|--------|-------------------------------------------------------------------------------------------------------------------|--------|---------------------|
| Object1                                                                                                     | Object2 | Object3 | Angle | e.s.d. | Angle                                                                                                             | e.s.d. | Absolute difference |
| C7                                                                                                          | C7      | C8      | 118   | 0.3    | 117.5                                                                                                             | 0.4    | 0.5                 |
| C7                                                                                                          | C7      | C8      | 118   | 0.3    | 117.5                                                                                                             | 0.4    | 0.5                 |
| C11                                                                                                         | C7      | C7      | 118   | 0.3    | 118.5                                                                                                             | 0.4    | 0.5                 |
| C11                                                                                                         | C7      | C7      | 118   | 0.3    | 118.5                                                                                                             | 0.4    | 0.5                 |
| C9                                                                                                          | C10     | C11     | 119.6 | 0.2    | 119.4                                                                                                             | 0.3    | 0.2                 |
| C9                                                                                                          | C10     | C11     | 119.6 | 0.2    | 119.4                                                                                                             | 0.3    | 0.2                 |
| C8                                                                                                          | C9      | C10     | 120.1 | 0.2    | 120.3                                                                                                             | 0.3    | 0.2                 |
| C8                                                                                                          | C9      | C10     | 120.1 | 0.2    | 120.3                                                                                                             | 0.3    | 0.2                 |
| C7                                                                                                          | C8      | C9      | 122   | 0.2    | 121.8                                                                                                             | 0.3    | 0.2                 |
| C7                                                                                                          | C8      | C9      | 122   | 0.2    | 121.8                                                                                                             | 0.3    | 0.2                 |
| C10                                                                                                         | C11     | C7      | 122.1 | 0.2    | 122.4                                                                                                             | 0.3    | 0.3                 |
| C10                                                                                                         | C11     | C7      | 122.1 | 0.2    | 122.4                                                                                                             | 0.3    | 0.3                 |
| C8                                                                                                          | C7      | C11     | 123.9 | 0.2    | 123.9                                                                                                             | 0.3    | 0                   |
| C11                                                                                                         | C7      | C8      | 123.9 | 0.2    | 123.9                                                                                                             | 0.3    | 0                   |
| Mean of e.s.d.:                                                                                             |         |         |       | 0.23   | 0.33                                                                                                              |        |                     |

|                               |       |
|-------------------------------|-------|
| Mean of absolute differences: | 0.271 |
|-------------------------------|-------|

1.6. Table S4. Comparison of bond angles of [Li+(TMEDA)<sub>2</sub>][C<sub>10</sub>H<sub>8</sub>•<sup>-</sup>] (**1**) with [K+([2,2,2]-cryptand)][C<sub>10</sub>H<sub>8</sub>•<sup>-</sup>] from ref. 5.

Table S4. Comparison of structures: bond angles of **1**

| Bond angles for [Li+(TMEDA) <sub>2</sub> ][C <sub>10</sub> H <sub>8</sub> • <sup>-</sup> ] ( <b>1</b> ) (°) |         |         |       |        | Bond angles for [K+([2,2,2]-cryptand)][C <sub>10</sub> H <sub>8</sub> • <sup>-</sup> ] (ref. 5) (°) |        |                     |
|-------------------------------------------------------------------------------------------------------------|---------|---------|-------|--------|-----------------------------------------------------------------------------------------------------|--------|---------------------|
| Object1                                                                                                     | Object2 | Object3 | Angle | e.s.d. | Angle                                                                                               | e.s.d. | Absolute difference |
| C7                                                                                                          | C7      | C8      | 118   | 0.3    | 118.1                                                                                               | 0.2    | 0.1                 |
| C7                                                                                                          | C7      | C8      | 118   | 0.3    | 118.1                                                                                               | 0.2    | 0.1                 |
| C11                                                                                                         | C7      | C7      | 118   | 0.3    | 118.3                                                                                               | 0.2    | 0.3                 |
| C11                                                                                                         | C7      | C7      | 118   | 0.3    | 118.3                                                                                               | 0.2    | 0.3                 |
| C9                                                                                                          | C10     | C11     | 119.6 | 0.2    | 120.1                                                                                               | 0.2    | 0.5                 |
| C9                                                                                                          | C10     | C11     | 119.6 | 0.2    | 120.1                                                                                               | 0.2    | 0.5                 |
| C8                                                                                                          | C9      | C10     | 120.1 | 0.2    | 120.5                                                                                               | 0.2    | 0.4                 |
| C8                                                                                                          | C9      | C10     | 120.1 | 0.2    | 120.5                                                                                               | 0.2    | 0.4                 |
| C7                                                                                                          | C8      | C9      | 122   | 0.2    | 121.46                                                                                              | 0.18   | 0.54                |
| C7                                                                                                          | C8      | C9      | 122   | 0.2    | 121.46                                                                                              | 0.18   | 0.54                |
| C10                                                                                                         | C11     | C7      | 122.1 | 0.2    | 121.5                                                                                               | 0.18   | 0.6                 |
| C10                                                                                                         | C11     | C7      | 122.1 | 0.2    | 121.5                                                                                               | 0.18   | 0.6                 |
| C8                                                                                                          | C7      | C11     | 123.9 | 0.2    | 123.64                                                                                              | 0.17   | 0.26                |
| C11                                                                                                         | C7      | C8      | 123.9 | 0.2    | 123.64                                                                                              | 0.17   | 0.26                |

|                               |      |       |
|-------------------------------|------|-------|
| Mean of e.s.d.:               | 0.23 | 0.19  |
| Mean of absolute differences: |      | 0.386 |

1.7. Table S5. Comparison of bond distances of [(Li+TMEDA)<sub>2</sub> C<sub>10</sub>H<sub>8</sub>-2] (**2**) with [(Li+TMEDA)<sub>2</sub> C<sub>10</sub>H<sub>8</sub>-2] from ref. 8.

Table S5. Comparison of structures: bond distances of **2**

| Bond distances for [(Li+TMEDA) <sub>2</sub> C <sub>10</sub> H <sub>8</sub> -2] ( <b>2</b> ) (°) |         |        |        | Bond distances for [(Li+TMEDA) <sub>2</sub> C <sub>10</sub> H <sub>8</sub> -2] (ref. 8) (°) |        |        | Absolute difference |
|-------------------------------------------------------------------------------------------------|---------|--------|--------|---------------------------------------------------------------------------------------------|--------|--------|---------------------|
| Object1                                                                                         | Object2 | Length | e.s.d. | Length                                                                                      | e.s.d. |        |                     |
| Li1                                                                                             | N2      | 2.128  | 0.002  | 2.094                                                                                       | 0.01   | 0.033  |                     |
| Li1                                                                                             | N1      | 2.123  | 0.002  | 2.133                                                                                       | 0.009  | 0.01   |                     |
| Li1                                                                                             | C8      | 2.311  | 0.002  | 2.321                                                                                       | 0.01   | 0.01   |                     |
| Li1                                                                                             | C9      | 2.296  | 0.002  | 2.265                                                                                       | 0.01   | 0.031  |                     |
| Li1                                                                                             | C10     | 2.287  | 0.002  | 2.257                                                                                       | 0.011  | 0.031  |                     |
| Li1                                                                                             | C11     | 2.309  | 0.002  | 2.327                                                                                       | 0.011  | 0.018  |                     |
| C8                                                                                              | C9      | 1.4341 | 0.0016 | 1.444                                                                                       | 0.008  | 0.01   |                     |
| C8                                                                                              | C7      | 1.4214 | 0.0015 | 1.432                                                                                       | 0.007  | 0.011  |                     |
| C9                                                                                              | C10     | 1.3630 | 0.0017 | 1.343                                                                                       | 0.008  | 0.02   |                     |
| C10                                                                                             | C11     | 1.4362 | 0.0016 | 1.422                                                                                       | 0.008  | 0.014  |                     |
| C11                                                                                             | C7      | 1.4142 | 0.0015 | 1.412                                                                                       | 0.007  | 0.002  |                     |
| C7                                                                                              | C7      | 1.4552 | 0.0019 | 1.447                                                                                       | 0.01   | 0.008  |                     |
| N2                                                                                              | C6      | 1.4610 | 0.0016 | 1.455                                                                                       | 0.008  | 0.006  |                     |
| N2                                                                                              | C5      | 1.4634 | 0.0015 | 1.459                                                                                       | 0.007  | 0.004  |                     |
| N2                                                                                              | C4      | 1.4640 | 0.0014 | 1.453                                                                                       | 0.007  | 0.011  |                     |
| C4                                                                                              | C3      | 1.5092 | 0.0018 | 1.462                                                                                       | 0.009  | 0.047  |                     |
| N1                                                                                              | C3      | 1.4690 | 0.0016 | 1.478                                                                                       | 0.008  | 0.009  |                     |
| N1                                                                                              | C1      | 1.4593 | 0.0016 | 1.453                                                                                       | 0.008  | 0.006  |                     |
| N1                                                                                              | C2      | 1.4567 | 0.0016 | 1.426                                                                                       | 0.008  | 0.031  |                     |
| Li1                                                                                             | N2      | 2.128  | 0.002  | 2.094                                                                                       | 0.01   | 0.033  |                     |
| Li1                                                                                             | N1      | 2.123  | 0.002  | 2.133                                                                                       | 0.009  | 0.01   |                     |
| Li1                                                                                             | C8      | 2.311  | 0.002  | 2.321                                                                                       | 0.01   | 0.01   |                     |
| Li1                                                                                             | C9      | 2.296  | 0.002  | 2.265                                                                                       | 0.01   | 0.031  |                     |
| Li1                                                                                             | C10     | 2.287  | 0.002  | 2.257                                                                                       | 0.011  | 0.031  |                     |
| Li1                                                                                             | C11     | 2.309  | 0.002  | 2.327                                                                                       | 0.011  | 0.018  |                     |
| C8                                                                                              | C9      | 1.4341 | 0.0016 | 1.444                                                                                       | 0.008  | 0.01   |                     |
| C8                                                                                              | C7      | 1.4214 | 0.0015 | 1.432                                                                                       | 0.007  | 0.011  |                     |
| C9                                                                                              | C10     | 1.3630 | 0.0017 | 1.343                                                                                       | 0.008  | 0.02   |                     |
| C10                                                                                             | C11     | 1.4362 | 0.0016 | 1.422                                                                                       | 0.008  | 0.014  |                     |
| C11                                                                                             | C7      | 1.4142 | 0.0015 | 1.412                                                                                       | 0.007  | 0.002  |                     |
| N2                                                                                              | C6      | 1.4610 | 0.0016 | 1.455                                                                                       | 0.008  | 0.006  |                     |
| N2                                                                                              | C5      | 1.4634 | 0.0015 | 1.459                                                                                       | 0.007  | 0.004  |                     |
| N2                                                                                              | C4      | 1.4640 | 0.0014 | 1.453                                                                                       | 0.007  | 0.011  |                     |
| C4                                                                                              | C3      | 1.5092 | 0.0018 | 1.462                                                                                       | 0.009  | 0.047  |                     |
| N1                                                                                              | C3      | 1.4690 | 0.0016 | 1.478                                                                                       | 0.008  | 0.009  |                     |
| N1                                                                                              | C1      | 1.4593 | 0.0016 | 1.453                                                                                       | 0.008  | 0.006  |                     |
| N1                                                                                              | C2      | 1.4567 | 0.0016 | 1.426                                                                                       | 0.008  | 0.031  |                     |
| Mean of e.s.d.:                                                                                 |         | 0.0017 |        | 0.0086                                                                                      |        |        |                     |
| Mean of absolute differences:                                                                   |         |        |        |                                                                                             |        | 0.0166 |                     |

1.8. Table S6. Comparison of bond angles of [(Li+TMEDA)<sub>2</sub> C<sub>10</sub>H<sub>8</sub>-2] (**2**) with [(Li+TMEDA)<sub>2</sub> C<sub>10</sub>H<sub>8</sub>-2] from ref. 8.

Table S6. Comparison of structures: bond angles of **2**

| Bond angles for [(Li+TMEDA) <sub>2</sub> C <sub>10</sub> H <sub>8</sub> -2] ( <b>2</b> ) (°) |         |         |        |        | Bond angles for [(Li+TMEDA) <sub>2</sub> C <sub>10</sub> H <sub>8</sub> -2] (ref. 8) (°) |        |                     |  |
|----------------------------------------------------------------------------------------------|---------|---------|--------|--------|------------------------------------------------------------------------------------------|--------|---------------------|--|
| Object1                                                                                      | Object2 | Object3 | Angle  | e.s.d. | Angle                                                                                    | e.s.d. | Absolute difference |  |
| N2                                                                                           | Li1     | N1      | 85.24  | 0.08   | 85.2                                                                                     | 0.4    | 0.05                |  |
| C8                                                                                           | Li1     | C9      | 36.27  | 0.05   | 36.7                                                                                     | 0.2    | 0.43                |  |
| C8                                                                                           | Li1     | C11     | 73.77  | 0.07   | 73.3                                                                                     | 0.3    | 0.47                |  |
| C9                                                                                           | Li1     | C10     | 34.60  | 0.05   | 34.5                                                                                     | 0.3    | 0.1                 |  |
| C10                                                                                          | Li1     | C11     | 36.41  | 0.05   | 36.1                                                                                     | 0.3    | 0.31                |  |
| C7                                                                                           | C8      | C9      | 121.24 | 0.10   | 119.9                                                                                    | 0.5    | 1.34                |  |
| C8                                                                                           | C9      | C10     | 119.52 | 0.10   | 120                                                                                      | 0.5    | 0.48                |  |
| C9                                                                                           | C10     | C11     | 119.32 | 0.10   | 119.9                                                                                    | 0.5    | 0.58                |  |
| C10                                                                                          | C11     | C7      | 121.46 | 0.10   | 121.3                                                                                    | 0.5    | 0.16                |  |
| C11                                                                                          | C7      | C7      | 117.84 | 0.12   | 118.1                                                                                    | 0.6    | 0.25                |  |
| C11                                                                                          | C7      | C8      | 124.61 | 0.10   | 124.4                                                                                    | 0.5    | 0.21                |  |
| C7                                                                                           | C7      | C8      | 117.55 | 0.12   | 117.5                                                                                    | 0.6    | 0.04                |  |
| Li1                                                                                          | N2      | C4      | 105.72 | 0.08   | 105.6                                                                                    | 0.4    | 0.12                |  |
| Li1                                                                                          | N2      | C5      | 104.86 | 0.09   | 105.5                                                                                    | 0.5    | 0.64                |  |
| Li1                                                                                          | N2      | C6      | 115.81 | 0.09   | 115.3                                                                                    | 0.5    | 0.5                 |  |
| C4                                                                                           | N2      | C5      | 110.92 | 0.10   | 111.6                                                                                    | 0.5    | 0.68                |  |
| C4                                                                                           | N2      | C6      | 110.04 | 0.09   | 111.1                                                                                    | 0.5    | 1.06                |  |
| C6                                                                                           | N2      | C5      | 109.36 | 0.10   | 107.5                                                                                    | 0.5    | 1.86                |  |
| N2                                                                                           | C4      | C3      | 111.32 | 0.09   | 114.1                                                                                    | 0.6    | 2.78                |  |
| C4                                                                                           | C3      | N1      | 111.99 | 0.10   | 114.4                                                                                    | 0.5    | 2.41                |  |
| Li1                                                                                          | N1      | C3      | 103.85 | 0.09   | 105.3                                                                                    | 0.4    | 1.46                |  |
| Li1                                                                                          | N1      | C1      | 106.58 | 0.09   | 106                                                                                      | 0.5    | 0.58                |  |
| Li1                                                                                          | N1      | C2      | 116.24 | 0.10   | 114.9                                                                                    | 0.5    | 1.35                |  |
| C3                                                                                           | N1      | C2      | 109.87 | 0.11   | 108.9                                                                                    | 0.5    | 0.96                |  |
| C3                                                                                           | N1      | C1      | 110.84 | 0.10   | 110.6                                                                                    | 0.5    | 0.24                |  |
| C2                                                                                           | N1      | C1      | 109.31 | 0.11   | 110.7                                                                                    | 0.6    | 1.38                |  |
| Mean of e.s.d.:                                                                              |         |         |        | 0.092  | 0.47                                                                                     |        |                     |  |
| Mean of absolute differences:                                                                |         |         |        |        |                                                                                          |        | 0.786               |  |

1.9. Figure S2. Distance lithium-naphthalene dianion plane in **2**.

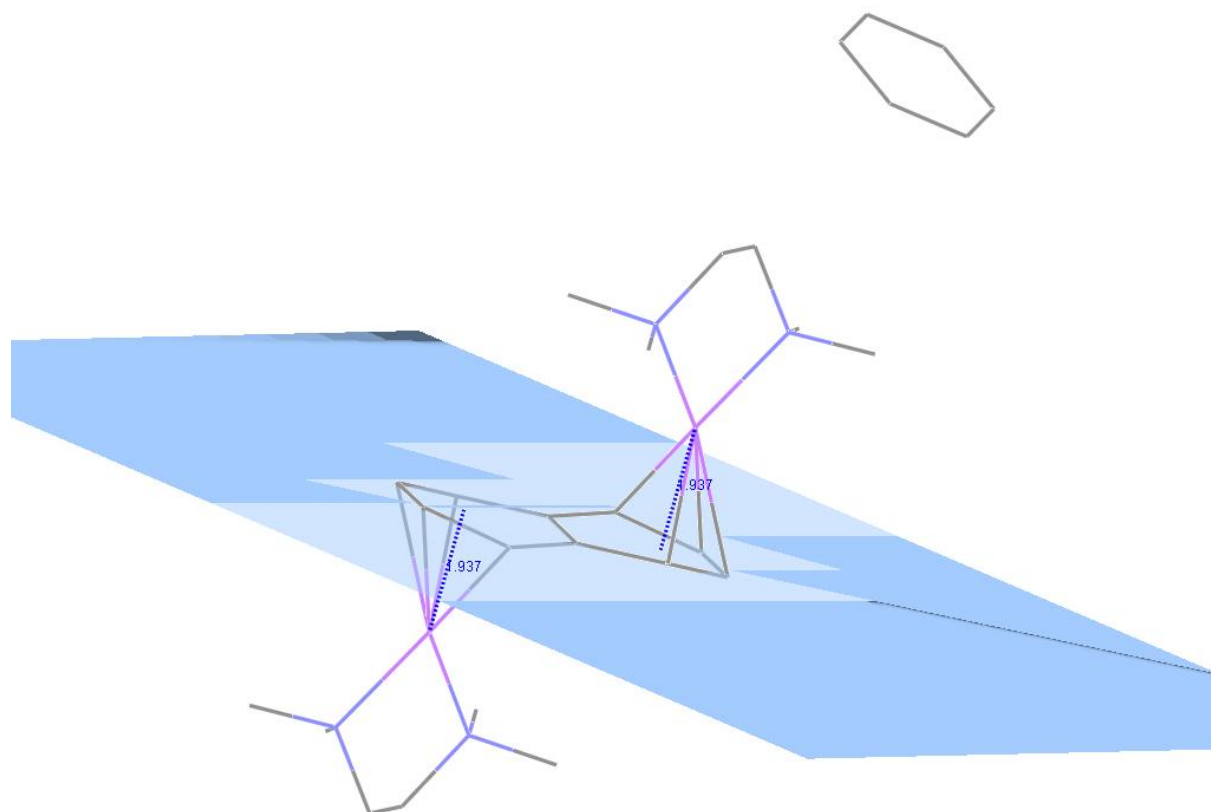

Figure S2. Calculated distance ( $1.937 \pm 0.006 \text{ \AA}$ ) between the lithium [ $\text{Li}^+(\text{TMEDA})$ ], and the least-squares mean plane of the anionic naphthalene moiety [ $\text{C}_{10}\text{H}_8^{-2}$ ] (blue plane), corresponding to **2**.

## 2. Computational details

### 2.1. General

Single point Hartree-Fock (HF), density functional theory (DFT) and second-order Møller-Plesset (MP2) perturbation theory were applied in this study on the experimental X-ray structure **2** after removal of the solvating benzene molecule. The respective calculations were performed with the Gaussian 03 package.<sup>4</sup> The SCF (self-consistent field Hartree-Fock) convergence criteria were set at  $10^{-8}$  a.u., and a pruned grid having 99 radial shells and 590 angular points per shell, was used in all cases. Calculations at the HF, DFT<sup>5</sup> using the B3LYP exchange-correlation functional,<sup>6</sup> and MP2<sup>7</sup> levels of theory were performed using the corresponding basis sets<sup>8</sup> as stated in Table 1. Natural Atomic Orbital and Natural Population Analysis (NPA) were performed using the NBO program Version 3.1.<sup>9</sup> The corresponding summaries of the NPA including natural atomic charges and natural electron configuration, followed by the summary of the corresponding *ab initio* or DFT calculation, are listed below.



## 2.2. HF/6-31+G(d,p)

Summary of Natural Population Analysis:

| Atom | No | Natural Charge | Natural Population |         |         |         |
|------|----|----------------|--------------------|---------|---------|---------|
|      |    |                | Core               | Valence | Rydberg | Total   |
| Li   | 1  | 0.89127        | 1.99919            | 0.08374 | 0.02580 | 2.10873 |
| N    | 2  | -0.64935       | 1.99961            | 5.62367 | 0.02607 | 7.64935 |
| C    | 3  | -0.34000       | 1.99950            | 4.32667 | 0.01383 | 6.34000 |
| H    | 4  | 0.20135        | 0.00000            | 0.79634 | 0.00231 | 0.79865 |
| H    | 5  | 0.19029        | 0.00000            | 0.80827 | 0.00144 | 0.80971 |
| H    | 6  | 0.17115        | 0.00000            | 0.82744 | 0.00141 | 0.82885 |
| C    | 7  | -0.33321       | 1.99951            | 4.32024 | 0.01346 | 6.33321 |
| H    | 8  | 0.16810        | 0.00000            | 0.83056 | 0.00134 | 0.83190 |
| H    | 9  | 0.19638        | 0.00000            | 0.80201 | 0.00161 | 0.80362 |
| H    | 10 | 0.20012        | 0.00000            | 0.79821 | 0.00166 | 0.79988 |
| C    | 11 | -0.17004       | 1.99938            | 4.15370 | 0.01696 | 6.17004 |
| H    | 12 | 0.19842        | 0.00000            | 0.80009 | 0.00149 | 0.80158 |
| H    | 13 | 0.18019        | 0.00000            | 0.81835 | 0.00146 | 0.81981 |
| C    | 14 | -0.16927       | 1.99939            | 4.15317 | 0.01671 | 6.16927 |
| H    | 15 | 0.19278        | 0.00000            | 0.80571 | 0.00151 | 0.80722 |
| H    | 16 | 0.18380        | 0.00000            | 0.81471 | 0.00149 | 0.81620 |
| N    | 17 | -0.65432       | 1.99961            | 5.62975 | 0.02496 | 7.65432 |
| C    | 18 | -0.33811       | 1.99948            | 4.32501 | 0.01362 | 6.33811 |
| H    | 19 | 0.16705        | 0.00000            | 0.83156 | 0.00139 | 0.83295 |
| H    | 20 | 0.22421        | 0.00000            | 0.77408 | 0.00171 | 0.77579 |
| H    | 21 | 0.18694        | 0.00000            | 0.81167 | 0.00139 | 0.81306 |
| C    | 22 | -0.33462       | 1.99949            | 4.32166 | 0.01348 | 6.33462 |
| H    | 23 | 0.18673        | 0.00000            | 0.81202 | 0.00125 | 0.81327 |
| H    | 24 | 0.21893        | 0.00000            | 0.77927 | 0.00180 | 0.78107 |
| H    | 25 | 0.16574        | 0.00000            | 0.83295 | 0.00131 | 0.83426 |
| C    | 26 | 0.01895        | 1.99909            | 3.95395 | 0.02801 | 5.98105 |
| C    | 27 | -0.56242       | 1.99926            | 4.52237 | 0.04078 | 6.56242 |
| H    | 28 | 0.18940        | 0.00000            | 0.80874 | 0.00186 | 0.81060 |
| C    | 29 | -0.28716       | 1.99931            | 4.25542 | 0.03244 | 6.28716 |
| H    | 30 | 0.18130        | 0.00000            | 0.81693 | 0.00177 | 0.81870 |
| C    | 31 | -0.30196       | 1.99932            | 4.26986 | 0.03278 | 6.30196 |
| H    | 32 | 0.18278        | 0.00000            | 0.81548 | 0.00175 | 0.81722 |
| C    | 33 | -0.54347       | 1.99925            | 4.50576 | 0.03847 | 6.54347 |
| H    | 34 | 0.18806        | 0.00000            | 0.81002 | 0.00192 | 0.81194 |
| Li   | 35 | 0.89127        | 1.99919            | 0.08374 | 0.02580 | 2.10873 |
| N    | 36 | -0.64935       | 1.99961            | 5.62367 | 0.02607 | 7.64935 |
| C    | 37 | -0.34000       | 1.99950            | 4.32667 | 0.01383 | 6.34000 |
| H    | 38 | 0.20135        | 0.00000            | 0.79634 | 0.00231 | 0.79865 |
| H    | 39 | 0.19029        | 0.00000            | 0.80827 | 0.00144 | 0.80971 |
| H    | 40 | 0.17115        | 0.00000            | 0.82744 | 0.00141 | 0.82885 |
| C    | 41 | -0.33321       | 1.99951            | 4.32024 | 0.01346 | 6.33321 |
| H    | 42 | 0.16810        | 0.00000            | 0.83056 | 0.00134 | 0.83190 |
| H    | 43 | 0.19638        | 0.00000            | 0.80201 | 0.00161 | 0.80362 |
| H    | 44 | 0.20012        | 0.00000            | 0.79821 | 0.00166 | 0.79988 |
| C    | 45 | -0.17004       | 1.99938            | 4.15370 | 0.01696 | 6.17004 |
| H    | 46 | 0.19842        | 0.00000            | 0.80009 | 0.00149 | 0.80158 |
| H    | 47 | 0.18019        | 0.00000            | 0.81835 | 0.00146 | 0.81981 |
| C    | 48 | -0.16927       | 1.99939            | 4.15317 | 0.01671 | 6.16927 |
| H    | 49 | 0.19278        | 0.00000            | 0.80571 | 0.00151 | 0.80722 |
| H    | 50 | 0.18380        | 0.00000            | 0.81471 | 0.00149 | 0.81620 |
| N    | 51 | -0.65432       | 1.99961            | 5.62975 | 0.02496 | 7.65432 |
| C    | 52 | -0.33811       | 1.99948            | 4.32501 | 0.01362 | 6.33811 |

# Supplementary Material (ESI) for Dalton Transactions  
 # This journal is (c) The Royal Society of Chemistry 2009

|           |    |          |          |           |         |           |
|-----------|----|----------|----------|-----------|---------|-----------|
| H         | 53 | 0.16705  | 0.00000  | 0.83156   | 0.00139 | 0.83295   |
| H         | 54 | 0.22421  | 0.00000  | 0.77408   | 0.00171 | 0.77579   |
| H         | 55 | 0.18694  | 0.00000  | 0.81167   | 0.00139 | 0.81306   |
| C         | 56 | -0.33462 | 1.99949  | 4.32166   | 0.01348 | 6.33462   |
| H         | 57 | 0.18673  | 0.00000  | 0.81202   | 0.00125 | 0.81327   |
| H         | 58 | 0.21893  | 0.00000  | 0.77927   | 0.00180 | 0.78107   |
| H         | 59 | 0.16574  | 0.00000  | 0.83295   | 0.00131 | 0.83426   |
| C         | 60 | 0.01895  | 1.99909  | 3.95395   | 0.02801 | 5.98105   |
| C         | 61 | -0.56242 | 1.99926  | 4.52237   | 0.04078 | 6.56242   |
| H         | 62 | 0.18940  | 0.00000  | 0.80874   | 0.00186 | 0.81060   |
| C         | 63 | -0.28716 | 1.99931  | 4.25542   | 0.03244 | 6.28716   |
| H         | 64 | 0.18130  | 0.00000  | 0.81693   | 0.00177 | 0.81870   |
| C         | 65 | -0.30196 | 1.99932  | 4.26986   | 0.03278 | 6.30196   |
| H         | 66 | 0.18278  | 0.00000  | 0.81548   | 0.00175 | 0.81722   |
| C         | 67 | -0.54347 | 1.99925  | 4.50576   | 0.03847 | 6.54347   |
| H         | 68 | 0.18806  | 0.00000  | 0.81002   | 0.00192 | 0.81194   |
| =====     |    |          |          |           |         |           |
| * Total * |    | 0.00000  | 55.98277 | 149.27873 | 0.73851 | 206.00000 |

Natural Population

|                       |           |                    |
|-----------------------|-----------|--------------------|
| Core                  | 55.98277  | ( 99.9692% of 56)  |
| Valence               | 149.27873 | ( 99.5192% of 150) |
| Natural Minimal Basis | 205.26149 | ( 99.6415% of 206) |
| Natural Rydberg Basis | 0.73851   | ( 0.3585% of 206)  |

Atom No Natural Electron Configuration

|    |    |                                                     |
|----|----|-----------------------------------------------------|
| Li | 1  | [core]2S( 0.08)3d( 0.01)4p( 0.01)                   |
| N  | 2  | [core]2S( 1.32)2p( 4.30)3d( 0.01)4p( 0.02)          |
| C  | 3  | [core]2S( 1.01)2p( 3.32)3d( 0.01)4p( 0.01)          |
| H  | 4  | 1S( 0.80)                                           |
| H  | 5  | 1S( 0.81)                                           |
| H  | 6  | 1S( 0.83)                                           |
| C  | 7  | [core]2S( 1.01)2p( 3.31)3d( 0.01)4p( 0.01)          |
| H  | 8  | 1S( 0.83)                                           |
| H  | 9  | 1S( 0.80)                                           |
| H  | 10 | 1S( 0.80)                                           |
| C  | 11 | [core]2S( 0.97)2p( 3.18)3d( 0.01)4p( 0.01)          |
| H  | 12 | 1S( 0.80)                                           |
| H  | 13 | 1S( 0.82)                                           |
| C  | 14 | [core]2S( 0.97)2p( 3.18)3d( 0.01)4p( 0.01)          |
| H  | 15 | 1S( 0.81)                                           |
| H  | 16 | 1S( 0.81)                                           |
| N  | 17 | [core]2S( 1.32)2p( 4.31)3d( 0.01)4p( 0.01)          |
| C  | 18 | [core]2S( 1.01)2p( 3.31)3d( 0.01)4p( 0.01)          |
| H  | 19 | 1S( 0.83)                                           |
| H  | 20 | 1S( 0.77)                                           |
| H  | 21 | 1S( 0.81)                                           |
| C  | 22 | [core]2S( 1.01)2p( 3.31)3d( 0.01)4p( 0.01)          |
| H  | 23 | 1S( 0.81)                                           |
| H  | 24 | 1S( 0.78)                                           |
| H  | 25 | 1S( 0.83)                                           |
| C  | 26 | [core]2S( 0.88)2p( 3.07)3p( 0.01)3d( 0.01)4p( 0.01) |
| C  | 27 | [core]2S( 0.92)2p( 3.61)4p( 0.03)                   |
| H  | 28 | 1S( 0.81)                                           |
| C  | 29 | [core]2S( 0.93)2p( 3.33)4p( 0.02)                   |
| H  | 30 | 1S( 0.82)                                           |
| C  | 31 | [core]2S( 0.93)2p( 3.34)4p( 0.02)                   |

# Supplementary Material (ESI) for Dalton Transactions  
# This journal is (c) The Royal Society of Chemistry 2009

|    |    |                                                     |
|----|----|-----------------------------------------------------|
| H  | 32 | 1S( 0.82)                                           |
| C  | 33 | [core]2S( 0.91)2p( 3.59)4p( 0.03)                   |
| H  | 34 | 1S( 0.81)                                           |
| Li | 35 | [core]2S( 0.08)3d( 0.01)4p( 0.01)                   |
| N  | 36 | [core]2S( 1.32)2p( 4.30)3d( 0.01)4p( 0.02)          |
| C  | 37 | [core]2S( 1.01)2p( 3.32)3d( 0.01)4p( 0.01)          |
| H  | 38 | 1S( 0.80)                                           |
| H  | 39 | 1S( 0.81)                                           |
| H  | 40 | 1S( 0.83)                                           |
| C  | 41 | [core]2S( 1.01)2p( 3.31)3d( 0.01)4p( 0.01)          |
| H  | 42 | 1S( 0.83)                                           |
| H  | 43 | 1S( 0.80)                                           |
| H  | 44 | 1S( 0.80)                                           |
| C  | 45 | [core]2S( 0.97)2p( 3.18)3d( 0.01)4p( 0.01)          |
| H  | 46 | 1S( 0.80)                                           |
| H  | 47 | 1S( 0.82)                                           |
| C  | 48 | [core]2S( 0.97)2p( 3.18)3d( 0.01)4p( 0.01)          |
| H  | 49 | 1S( 0.81)                                           |
| H  | 50 | 1S( 0.81)                                           |
| N  | 51 | [core]2S( 1.32)2p( 4.31)3d( 0.01)4p( 0.01)          |
| C  | 52 | [core]2S( 1.01)2p( 3.31)3d( 0.01)4p( 0.01)          |
| H  | 53 | 1S( 0.83)                                           |
| H  | 54 | 1S( 0.77)                                           |
| H  | 55 | 1S( 0.81)                                           |
| C  | 56 | [core]2S( 1.01)2p( 3.31)3d( 0.01)4p( 0.01)          |
| H  | 57 | 1S( 0.81)                                           |
| H  | 58 | 1S( 0.78)                                           |
| H  | 59 | 1S( 0.83)                                           |
| C  | 60 | [core]2S( 0.88)2p( 3.07)3p( 0.01)3d( 0.01)4p( 0.01) |
| C  | 61 | [core]2S( 0.92)2p( 3.61)4p( 0.03)                   |
| H  | 62 | 1S( 0.81)                                           |
| C  | 63 | [core]2S( 0.93)2p( 3.33)4p( 0.02)                   |
| H  | 64 | 1S( 0.82)                                           |
| C  | 65 | [core]2S( 0.93)2p( 3.34)4p( 0.02)                   |
| H  | 66 | 1S( 0.82)                                           |
| C  | 67 | [core]2S( 0.91)2p( 3.59)4p( 0.03)                   |
| H  | 68 | 1S( 0.81)                                           |

NBO analysis skipped by request.

1|1|UNPC-UNK|SP|RHF|6-31+G(d,p)|C22H40Li2N4|PCUSER|02-Sep-2008|0||# HF  
/6-31+G(D,P) POP=(NPA,FULL) GEOM=CONNECTIVITY SCF=TIGHT INT=ULTRAFINE|  
|Single point on 2||0,1|Li|N,1,2.12275239|C,2,1.45922543,1,106.58359  
672|H,3,0.95993404,2,109.47987106,1,68.7306377,0|H,3,0.95978992,2,109.  
45930829,1,-51.24126721,0|H,3,0.95990392,2,109.46293755,1,-171.2879933  
,0|C,2,1.45677212,1,116.24538622,3,122.11570946,0|H,7,0.95997646,2,109  
.50539566,1,178.57829491,0|H,7,0.9598592,2,109.5146923,1,58.50375648,0  
|H,7,0.96069526,2,109.47933752,1,-61.46509045,0|C,2,1.46889305,1,103.8  
4294701,3,-117.11645077,0|H,11,0.97023252,2,109.20467954,1,-79.4609245  
1,0|H,11,0.96968767,2,109.20598111,1,162.69895523,0|C,11,1.50920707,2,  
111.99365366,1,41.60879241,0|H,14,0.96990107,11,109.37569001,2,66.3139  
3929,0|H,14,0.96955258,11,109.33417399,2,-175.61174162,0|N,14,1.463974  
51,11,111.31579847,2,-54.66721341,0|C,17,1.46333286,14,110.91788568,11  
, -78.12473783,0|H,18,0.95972205,17,109.47692249,14,-59.50667739,0|H,18  
,0.95978967,17,109.48126841,14,-179.5447939,0|H,18,0.96033041,17,109.4  
8165817,14,60.4845624,0|C,17,1.46103898,14,110.03736109,11,160.7376311  
8,0|H,22,0.96023482,17,109.50323596,14,-59.76055302,0|H,22,0.96017707,  
17,109.43923217,14,-179.75373608,0|H,22,0.96006393,17,109.48198252,14,  
60.24861259,0|C,1,2.61216876,2,145.37721711,7,-28.28319714,0|C,26,1.42  
140755,1,61.8640062,2,45.90731574,0|H,27,0.93007073,26,119.39920175,1,  
-115.26555427,0|C,27,1.43412045,26,121.23681398,1,64.76636099,0|H,29,0

# Supplementary Material (ESI) for Dalton Transactions  
 # This journal is (c) The Royal Society of Chemistry 2009

```
.93047313,27,120.21929297,26,164.8650778,0|C,29,1.36283671,27,119.5255
9339,26,-15.13703593,0|H,31,0.92983066,29,120.37102273,27,-179.0110921
1,0|C,31,1.43624804,29,119.32314263,27,0.97132326,0|H,33,0.92987985,31
,119.29773231,29,-166.29894867,0|Li,26,2.60977624,1,147.63983696,2,-17
9.47269208,0|N,35,2.12275239,26,177.71876604,1,-7.54852098,0|C,36,1.45
922543,35,106.58359672,26,157.50758299,0|H,37,0.95993404,36,109.479871
06,35,-68.7306377,0|H,37,0.95978992,36,109.45930829,35,51.24126721,0|H
,37,0.95990392,36,109.46293755,35,171.2879933,0|C,36,1.45677212,35,116
.24538622,26,35.39187353,0|H,41,0.95997646,36,109.50539566,35,-178.578
29491,0|H,41,0.9598592,36,109.5146923,35,-58.50375648,0|H,41,0.9606952
6,36,109.47933752,35,61.46509045,0|C,36,1.46889305,35,103.84294701,26,
-85.37596623,0|H,45,0.97023252,36,109.20467954,35,79.46092451,0|H,45,0
.96968767,36,109.20598111,35,-162.69895523,0|C,45,1.50920707,36,111.99
365366,35,-41.60879241,0|H,48,0.96990107,45,109.37569001,36,-66.313939
29,0|H,48,0.96955258,45,109.33417399,36,175.61174162,0|N,48,1.46397451
,45,111.31579847,36,54.66721341,0|C,51,1.46333286,48,110.91788568,45,7
8.12473783,0|H,52,0.95972205,51,109.47692249,48,59.50667739,0|H,52,0.9
5978967,51,109.48126841,48,179.5447939,0|H,52,0.96033041,51,109.481658
17,48,-60.4845624,0|C,51,1.46103898,48,110.03736109,45,-160.73763118,0
|H,56,0.96023482,51,109.50323596,48,59.76055302,0|H,56,0.96017707,51,1
09.43923217,48,179.75373608,0|H,56,0.96006393,51,109.48198252,48,-60.2
4861259,0|C,33,1.41420858,31,121.45757832,29,13.7272786,0|C,60,1.42140
755,33,124.60868346,31,166.05739581,0|H,61,0.93007073,60,119.39920175,
33,-14.40723538,0|C,61,1.43412045,60,121.23681398,33,165.56084937,0|H,
63,0.93047313,61,120.21929297,60,-164.8650778,0|C,63,1.36283671,61,119
.52559339,60,15.13703593,0|H,65,0.92983066,63,120.37102273,61,179.0110
9211,0|C,26,1.41420858,1,136.98552198,2,-65.86852632,0|H,67,0.92987985
,26,119.24468425,1,98.16379666,0||Version=IA32L-G03RevC.02|State=1
-AG|HF=-1088.5310227|RMSD=5.937e-009|Dipole=0.,0.,0.|PG=CI [X(C22H40Li
2N4)]||@
```

### 2.3. HF/6-311++G(d,p)

Summary of Natural Population Analysis:

| Atom | No | Natural<br>Charge | Natural Population |         |         |         |
|------|----|-------------------|--------------------|---------|---------|---------|
|      |    |                   | Core               | Valence | Rydberg | Total   |
| Li   | 1  | 0.85899           | 1.99923            | 0.11352 | 0.02826 | 2.14101 |
| N    | 2  | -0.62061          | 1.99961            | 5.59465 | 0.02635 | 7.62061 |
| C    | 3  | -0.22488          | 1.99914            | 4.21235 | 0.01339 | 6.22488 |
| H    | 4  | 0.15934           | 0.00000            | 0.83860 | 0.00207 | 0.84066 |
| H    | 5  | 0.14843           | 0.00000            | 0.84997 | 0.00160 | 0.85157 |
| H    | 6  | 0.13026           | 0.00000            | 0.86793 | 0.00181 | 0.86974 |
| C    | 7  | -0.21550          | 1.99913            | 4.20348 | 0.01288 | 6.21550 |
| H    | 8  | 0.12717           | 0.00000            | 0.87112 | 0.00171 | 0.87283 |
| H    | 9  | 0.15348           | 0.00000            | 0.84495 | 0.00157 | 0.84652 |
| H    | 10 | 0.15711           | 0.00000            | 0.84127 | 0.00162 | 0.84289 |
| C    | 11 | -0.07133          | 1.99905            | 4.05581 | 0.01647 | 6.07133 |
| H    | 12 | 0.14759           | 0.00000            | 0.85060 | 0.00182 | 0.85241 |
| H    | 13 | 0.13136           | 0.00000            | 0.86659 | 0.00205 | 0.86864 |
| C    | 14 | -0.07163          | 1.99906            | 4.05637 | 0.01620 | 6.07163 |
| H    | 15 | 0.14255           | 0.00000            | 0.85567 | 0.00179 | 0.85745 |
| H    | 16 | 0.13562           | 0.00000            | 0.86241 | 0.00197 | 0.86438 |
| N    | 17 | -0.62449          | 1.99961            | 5.60186 | 0.02302 | 7.62449 |
| C    | 18 | -0.22693          | 1.99911            | 4.20784 | 0.01998 | 6.22693 |
| H    | 19 | 0.12689           | 0.00000            | 0.87170 | 0.00141 | 0.87311 |

# Supplementary Material (ESI) for Dalton Transactions  
 # This journal is (c) The Royal Society of Chemistry 2009

|    |    |          |         |         |         |         |
|----|----|----------|---------|---------|---------|---------|
| H  | 20 | 0.18445  | 0.00000 | 0.81378 | 0.00177 | 0.81555 |
| H  | 21 | 0.14587  | 0.00000 | 0.85280 | 0.00133 | 0.85413 |
| C  | 22 | -0.21810 | 1.99912 | 4.20614 | 0.01285 | 6.21810 |
| H  | 23 | 0.14395  | 0.00000 | 0.85472 | 0.00133 | 0.85605 |
| H  | 24 | 0.17783  | 0.00000 | 0.82058 | 0.00159 | 0.82217 |
| H  | 25 | 0.12484  | 0.00000 | 0.87354 | 0.00162 | 0.87516 |
| C  | 26 | 0.01647  | 1.99918 | 3.95496 | 0.02939 | 5.98353 |
| C  | 27 | -0.52283 | 1.99917 | 4.48386 | 0.03980 | 6.52283 |
| H  | 28 | 0.15002  | 0.00000 | 0.84760 | 0.00238 | 0.84998 |
| C  | 29 | -0.24112 | 1.99929 | 4.21219 | 0.02964 | 6.24112 |
| H  | 30 | 0.14081  | 0.00000 | 0.85722 | 0.00197 | 0.85919 |
| C  | 31 | -0.25630 | 1.99929 | 4.22593 | 0.03109 | 6.25630 |
| H  | 32 | 0.14273  | 0.00000 | 0.85537 | 0.00190 | 0.85727 |
| C  | 33 | -0.50990 | 1.99916 | 4.46739 | 0.04334 | 6.50990 |
| H  | 34 | 0.14929  | 0.00000 | 0.84841 | 0.00230 | 0.85071 |
| Li | 35 | 0.85762  | 1.99923 | 0.11351 | 0.02964 | 2.14238 |
| N  | 36 | -0.62074 | 1.99961 | 5.59463 | 0.02650 | 7.62074 |
| C  | 37 | -0.22490 | 1.99914 | 4.21237 | 0.01340 | 6.22490 |
| H  | 38 | 0.15933  | 0.00000 | 0.83860 | 0.00207 | 0.84067 |
| H  | 39 | 0.14843  | 0.00000 | 0.84998 | 0.00160 | 0.85157 |
| H  | 40 | 0.13026  | 0.00000 | 0.86793 | 0.00181 | 0.86974 |
| C  | 41 | -0.21550 | 1.99913 | 4.20348 | 0.01288 | 6.21550 |
| H  | 42 | 0.12718  | 0.00000 | 0.87112 | 0.00171 | 0.87282 |
| H  | 43 | 0.15347  | 0.00000 | 0.84495 | 0.00157 | 0.84653 |
| H  | 44 | 0.15711  | 0.00000 | 0.84127 | 0.00163 | 0.84289 |
| C  | 45 | -0.07133 | 1.99905 | 4.05580 | 0.01648 | 6.07133 |
| H  | 46 | 0.14758  | 0.00000 | 0.85060 | 0.00182 | 0.85242 |
| H  | 47 | 0.13136  | 0.00000 | 0.86659 | 0.00205 | 0.86864 |
| C  | 48 | -0.07164 | 1.99906 | 4.05637 | 0.01621 | 6.07164 |
| H  | 49 | 0.14255  | 0.00000 | 0.85567 | 0.00179 | 0.85745 |
| H  | 50 | 0.13562  | 0.00000 | 0.86241 | 0.00197 | 0.86438 |
| N  | 51 | -0.62453 | 1.99961 | 5.60189 | 0.02303 | 7.62453 |
| C  | 52 | -0.22696 | 1.99911 | 4.20783 | 0.02001 | 6.22696 |
| H  | 53 | 0.12689  | 0.00000 | 0.87170 | 0.00141 | 0.87311 |
| H  | 54 | 0.18443  | 0.00000 | 0.81377 | 0.00180 | 0.81557 |
| H  | 55 | 0.14587  | 0.00000 | 0.85281 | 0.00133 | 0.85413 |
| C  | 56 | -0.21811 | 1.99912 | 4.20614 | 0.01285 | 6.21811 |
| H  | 57 | 0.14395  | 0.00000 | 0.85472 | 0.00133 | 0.85605 |
| H  | 58 | 0.17782  | 0.00000 | 0.82058 | 0.00160 | 0.82218 |
| H  | 59 | 0.12484  | 0.00000 | 0.87354 | 0.00162 | 0.87516 |
| C  | 60 | 0.02464  | 1.99917 | 3.94698 | 0.02922 | 5.97536 |
| C  | 61 | -0.52259 | 1.99917 | 4.48370 | 0.03973 | 6.52259 |
| H  | 62 | 0.14998  | 0.00000 | 0.84763 | 0.00239 | 0.85002 |
| C  | 63 | -0.24101 | 1.99929 | 4.21222 | 0.02949 | 6.24101 |
| H  | 64 | 0.14079  | 0.00000 | 0.85722 | 0.00199 | 0.85921 |
| C  | 65 | -0.26095 | 1.99931 | 4.23014 | 0.03150 | 6.26095 |
| H  | 66 | 0.14271  | 0.00000 | 0.85535 | 0.00194 | 0.85729 |
| C  | 67 | -0.49309 | 1.99889 | 4.45066 | 0.04354 | 6.49309 |
| H  | 68 | 0.14753  | 0.00000 | 0.84996 | 0.00251 | 0.85247 |

=====  
 \* Total \*      0.00000      55.97805      149.26328      0.75867      206.00000

Natural Population

-----  
 Core                      55.97805 ( 99.9608% of 56)  
 Valence                    149.26328 ( 99.5089% of 150)  
 Natural Minimal Basis    205.24133 ( 99.6317% of 206)  
 Natural Rydberg Basis    0.75867 ( 0.3683% of 206)  
 -----

Atom No                      Natural Electron Configuration

--

|    |    |                                            |
|----|----|--------------------------------------------|
| Li | 1  | [core]2S( 0.11)3d( 0.01)4p( 0.01)          |
| N  | 2  | [core]2S( 1.32)2p( 4.27)3p( 0.01)4p( 0.01) |
| C  | 3  | [core]2S( 0.96)2p( 3.25)3d( 0.01)          |
| H  | 4  | 1S( 0.84)                                  |
| H  | 5  | 1S( 0.85)                                  |
| H  | 6  | 1S( 0.87)                                  |
| C  | 7  | [core]2S( 0.96)2p( 3.25)3d( 0.01)          |
| H  | 8  | 1S( 0.87)                                  |
| H  | 9  | 1S( 0.84)                                  |
| H  | 10 | 1S( 0.84)                                  |
| C  | 11 | [core]2S( 0.94)2p( 3.12)3p( 0.01)3d( 0.01) |
| H  | 12 | 1S( 0.85)                                  |
| H  | 13 | 1S( 0.87)                                  |
| C  | 14 | [core]2S( 0.93)2p( 3.12)3p( 0.01)3d( 0.01) |
| H  | 15 | 1S( 0.86)                                  |
| H  | 16 | 1S( 0.86)                                  |
| N  | 17 | [core]2S( 1.32)2p( 4.28)4p( 0.01)          |
| C  | 18 | [core]2S( 0.96)2p( 3.25)3d( 0.01)          |
| H  | 19 | 1S( 0.87)                                  |
| H  | 20 | 1S( 0.81)                                  |
| H  | 21 | 1S( 0.85)                                  |
| C  | 22 | [core]2S( 0.96)2p( 3.25)3d( 0.01)          |
| H  | 23 | 1S( 0.85)                                  |
| H  | 24 | 1S( 0.82)                                  |
| H  | 25 | 1S( 0.87)                                  |
| C  | 26 | [core]2S( 0.88)2p( 3.08)3d( 0.01)4p( 0.02) |
| C  | 27 | [core]2S( 0.89)2p( 3.59)4p( 0.03)          |
| H  | 28 | 1S( 0.85)                                  |
| C  | 29 | [core]2S( 0.90)2p( 3.31)3d( 0.01)4p( 0.02) |
| H  | 30 | 1S( 0.86)                                  |
| C  | 31 | [core]2S( 0.90)2p( 3.32)3d( 0.01)4p( 0.02) |
| H  | 32 | 1S( 0.86)                                  |
| C  | 33 | [core]2S( 0.89)2p( 3.58)3p( 0.01)4p( 0.03) |
| H  | 34 | 1S( 0.85)                                  |
| Li | 35 | [core]2S( 0.11)3d( 0.01)4p( 0.02)          |
| N  | 36 | [core]2S( 1.32)2p( 4.27)3p( 0.01)4p( 0.01) |
| C  | 37 | [core]2S( 0.96)2p( 3.25)3d( 0.01)          |
| H  | 38 | 1S( 0.84)                                  |
| H  | 39 | 1S( 0.85)                                  |
| H  | 40 | 1S( 0.87)                                  |
| C  | 41 | [core]2S( 0.96)2p( 3.25)3d( 0.01)          |
| H  | 42 | 1S( 0.87)                                  |
| H  | 43 | 1S( 0.84)                                  |
| H  | 44 | 1S( 0.84)                                  |
| C  | 45 | [core]2S( 0.94)2p( 3.12)3p( 0.01)3d( 0.01) |
| H  | 46 | 1S( 0.85)                                  |
| H  | 47 | 1S( 0.87)                                  |
| C  | 48 | [core]2S( 0.93)2p( 3.12)3p( 0.01)3d( 0.01) |
| H  | 49 | 1S( 0.86)                                  |
| H  | 50 | 1S( 0.86)                                  |
| N  | 51 | [core]2S( 1.32)2p( 4.28)4p( 0.01)          |
| C  | 52 | [core]2S( 0.96)2p( 3.25)3d( 0.01)          |
| H  | 53 | 1S( 0.87)                                  |
| H  | 54 | 1S( 0.81)                                  |
| H  | 55 | 1S( 0.85)                                  |
| C  | 56 | [core]2S( 0.96)2p( 3.25)3d( 0.01)          |
| H  | 57 | 1S( 0.85)                                  |
| H  | 58 | 1S( 0.82)                                  |
| H  | 59 | 1S( 0.87)                                  |

# Supplementary Material (ESI) for Dalton Transactions  
# This journal is (c) The Royal Society of Chemistry 2009

|   |    |                                                     |
|---|----|-----------------------------------------------------|
| C | 60 | [core]2S( 0.87)2p( 3.07)3d( 0.01)4p( 0.02)          |
| C | 61 | [core]2S( 0.89)2p( 3.59)4p( 0.03)                   |
| H | 62 | 1S( 0.85)                                           |
| C | 63 | [core]2S( 0.90)2p( 3.31)3p( 0.01)3d( 0.01)4p( 0.01) |
| H | 64 | 1S( 0.86)                                           |
| C | 65 | [core]2S( 0.91)2p( 3.32)4p( 0.02)                   |
| H | 66 | 1S( 0.86)                                           |
| C | 67 | [core]2S( 0.87)2p( 3.58)3p( 0.01)4p( 0.03)          |
| H | 68 | 1S( 0.85)                                           |

NBO analysis skipped by request.

```
1|1|UNPC-UNK|SP|RHF|6-311++G(d,p)|C22H40Li2N4|PCUSER|06-Sep-2008|0||#
HF/6-311++G(D,P) POP=(NPA,FULL) GEOM=CONNECTIVITY INT=ULTRAFINE SCF=TI
GHT|Single point on 2||0,1|Li|N,1,2.12275239|C,2,1.45922543,1,106.5
8359672|H,3,0.95993404,2,109.47987106,1,68.7306377,0|H,3,0.95978992,2,
109.45930829,1,-51.24126721,0|H,3,0.95990392,2,109.46293755,1,-171.287
9933,0|C,2,1.45677212,1,116.24538622,3,122.11570946,0|H,7,0.95997646,2
,109.50539566,1,178.57829491,0|H,7,0.9598592,2,109.5146923,1,58.503756
48,0|H,7,0.96069526,2,109.47933752,1,-61.46509045,0|C,2,1.46889305,1,1
03.84294701,3,-117.11645077,0|H,11,0.97023252,2,109.20467954,1,-79.460
92451,0|H,11,0.96968767,2,109.20598111,1,162.69895523,0|C,11,1.5092070
7,2,111.99365366,1,41.60879241,0|H,14,0.96990107,11,109.37569001,2,66.
31393929,0|H,14,0.96955258,11,109.33417399,2,-175.61174162,0|N,14,1.46
397451,11,111.31579847,2,-54.66721341,0|C,17,1.46333286,14,110.9178856
8,11,-78.12473783,0|H,18,0.95972205,17,109.47692249,14,-59.50667739,0|
H,18,0.95978967,17,109.48126841,14,-179.5447939,0|H,18,0.96033041,17,1
09.48165817,14,60.4845624,0|C,17,1.46103898,14,110.03736109,11,160.737
63118,0|H,22,0.96023482,17,109.50323596,14,-59.76055302,0|H,22,0.96017
707,17,109.43923217,14,-179.75373608,0|H,22,0.96006393,17,109.48198252
,14,60.24861259,0|C,1,2.61216876,2,145.37721711,7,-28.28319714,0|C,26,
1.42140755,1,61.8640062,2,45.90731574,0|H,27,0.93007073,26,119.3992017
5,1,-115.26555427,0|C,27,1.43412045,26,121.23681398,1,64.76636099,0|H,
29,0.93047313,27,120.21929297,26,164.8650778,0|C,29,1.36283671,27,119.
52559339,26,-15.13703593,0|H,31,0.92983066,29,120.37102273,27,-179.011
09211,0|C,31,1.43624804,29,119.32314263,27,0.97132326,0|H,33,0.9298798
5,31,119.29773231,29,-166.29894867,0|Li,26,2.60977624,1,147.63983696,2
,-179.47269208,0|N,35,2.12275239,26,177.71876604,1,-7.54852098,0|C,36,
1.45922543,35,106.58359672,26,157.50758299,0|H,37,0.95993404,36,109.47
987106,35,-68.7306377,0|H,37,0.95978992,36,109.45930829,35,51.24126721
,0|H,37,0.95990392,36,109.46293755,35,171.2879933,0|C,36,1.45677212,35
,116.24538622,26,35.39187353,0|H,41,0.95997646,36,109.50539566,35,-178
.57829491,0|H,41,0.9598592,36,109.5146923,35,-58.50375648,0|H,41,0.960
69526,36,109.47933752,35,61.46509045,0|C,36,1.46889305,35,103.84294701
,26,-85.37596623,0|H,45,0.97023252,36,109.20467954,35,79.46092451,0|H,
45,0.96968767,36,109.20598111,35,-162.69895523,0|C,45,1.50920707,36,11
1.99365366,35,-41.60879241,0|H,48,0.96990107,45,109.37569001,36,-66.31
393929,0|H,48,0.96955258,45,109.33417399,36,175.61174162,0|N,48,1.4639
7451,45,111.31579847,36,54.66721341,0|C,51,1.46333286,48,110.91788568,
45,78.12473783,0|H,52,0.95972205,51,109.47692249,48,59.50667739,0|H,52
,0.95978967,51,109.48126841,48,179.5447939,0|H,52,0.96033041,51,109.48
165817,48,-60.4845624,0|C,51,1.46103898,48,110.03736109,45,-160.737631
18,0|H,56,0.96023482,51,109.50323596,48,59.76055302,0|H,56,0.96017707,
51,109.43923217,48,179.75373608,0|H,56,0.96006393,51,109.48198252,48,-
60.24861259,0|C,33,1.41420858,31,121.45757832,29,13.7272786,0|C,60,1.4
2140755,33,124.60868346,31,166.05739581,0|H,61,0.93007073,60,119.39920
175,33,-14.40723538,0|C,61,1.43412045,60,121.23681398,33,165.56084937,
0|H,63,0.93047313,61,120.21929297,60,-164.8650778,0|C,63,1.36283671,61
,119.52559339,60,15.13703593,0|H,65,0.92983066,63,120.37102273,61,179.
01109211,0|C,26,1.41420858,1,136.98552198,2,-65.86852632,0|H,67,0.9298
7985,26,119.24468425,1,98.16379666,0|| Version=IA32L-G03RevC.02|Sta
```

# Supplementary Material (ESI) for Dalton Transactions  
# This journal is (c) The Royal Society of Chemistry 2009

te=1-AG|HF=-1088.7246449|RMSD=6.864e-009|Dipole=0.,0.,0.|PG=CI [X(C22H  
40Li2N4)]|@

## 2.4. B3LYP/6-31+G(d,p)

Summary of Natural Population Analysis:

| Atom | No | Natural<br>Charge | Natural Population |         |         |         |
|------|----|-------------------|--------------------|---------|---------|---------|
|      |    |                   | Core               | Valence | Rydberg | Total   |
| Li   | 1  | 0.87925           | 1.99891            | 0.09228 | 0.02956 | 2.12075 |
| N    | 2  | -0.59184          | 1.99961            | 5.56753 | 0.02471 | 7.59184 |
| C    | 3  | -0.41882          | 1.99945            | 4.40801 | 0.01136 | 6.41882 |
| H    | 4  | 0.22133           | 0.00000            | 0.77612 | 0.00255 | 0.77867 |
| H    | 5  | 0.21064           | 0.00000            | 0.78806 | 0.00130 | 0.78936 |
| H    | 6  | 0.18961           | 0.00000            | 0.80852 | 0.00187 | 0.81039 |
| C    | 7  | -0.41173          | 1.99946            | 4.40168 | 0.01059 | 6.41173 |
| H    | 8  | 0.18691           | 0.00000            | 0.81140 | 0.00169 | 0.81309 |
| H    | 9  | 0.21650           | 0.00000            | 0.78186 | 0.00164 | 0.78350 |
| H    | 10 | 0.22031           | 0.00000            | 0.77782 | 0.00187 | 0.77969 |
| C    | 11 | -0.22867          | 1.99933            | 4.21575 | 0.01360 | 6.22867 |
| H    | 12 | 0.21862           | 0.00000            | 0.77994 | 0.00144 | 0.78138 |
| H    | 13 | 0.20033           | 0.00000            | 0.79758 | 0.00209 | 0.79967 |
| C    | 14 | -0.22791          | 1.99934            | 4.21522 | 0.01335 | 6.22791 |
| H    | 15 | 0.21333           | 0.00000            | 0.78525 | 0.00142 | 0.78667 |
| H    | 16 | 0.20375           | 0.00000            | 0.79407 | 0.00218 | 0.79625 |
| N    | 17 | -0.59555          | 1.99960            | 5.57287 | 0.02307 | 7.59555 |
| C    | 18 | -0.41748          | 1.99943            | 4.40694 | 0.01111 | 6.41748 |
| H    | 19 | 0.18651           | 0.00000            | 0.81164 | 0.00185 | 0.81349 |
| H    | 20 | 0.24305           | 0.00000            | 0.75541 | 0.00154 | 0.75695 |
| H    | 21 | 0.20759           | 0.00000            | 0.79115 | 0.00126 | 0.79241 |
| C    | 22 | -0.41349          | 1.99944            | 4.40327 | 0.01078 | 6.41349 |
| H    | 23 | 0.20802           | 0.00000            | 0.79083 | 0.00115 | 0.79198 |
| H    | 24 | 0.23651           | 0.00000            | 0.76145 | 0.00204 | 0.76349 |
| H    | 25 | 0.18537           | 0.00000            | 0.81297 | 0.00165 | 0.81463 |
| C    | 26 | -0.04647          | 1.99910            | 4.02440 | 0.02298 | 6.04647 |
| C    | 27 | -0.51252          | 1.99924            | 4.48124 | 0.03204 | 6.51252 |
| H    | 28 | 0.19727           | 0.00000            | 0.80055 | 0.00219 | 0.80273 |
| C    | 29 | -0.32180          | 1.99930            | 4.29604 | 0.02645 | 6.32180 |
| H    | 30 | 0.19389           | 0.00000            | 0.80415 | 0.00197 | 0.80611 |
| C    | 31 | -0.33226          | 1.99931            | 4.30644 | 0.02651 | 6.33226 |
| H    | 32 | 0.19529           | 0.00000            | 0.80278 | 0.00193 | 0.80471 |
| C    | 33 | -0.49354          | 1.99923            | 4.46504 | 0.02926 | 6.49354 |
| H    | 34 | 0.19611           | 0.00000            | 0.80162 | 0.00227 | 0.80389 |
| Li   | 35 | 0.87868           | 1.99891            | 0.09219 | 0.03022 | 2.12132 |
| N    | 36 | -0.59203          | 1.99961            | 5.56754 | 0.02488 | 7.59203 |
| C    | 37 | -0.41898          | 1.99945            | 4.40802 | 0.01151 | 6.41898 |
| H    | 38 | 0.22109           | 0.00000            | 0.77611 | 0.00280 | 0.77891 |
| H    | 39 | 0.21063           | 0.00000            | 0.78806 | 0.00130 | 0.78937 |
| H    | 40 | 0.18960           | 0.00000            | 0.80852 | 0.00188 | 0.81040 |
| C    | 41 | -0.41192          | 1.99946            | 4.40169 | 0.01077 | 6.41192 |
| H    | 42 | 0.18691           | 0.00000            | 0.81140 | 0.00169 | 0.81309 |
| H    | 43 | 0.21645           | 0.00000            | 0.78186 | 0.00169 | 0.78355 |
| H    | 44 | 0.22033           | 0.00000            | 0.77785 | 0.00183 | 0.77967 |
| C    | 45 | -0.22875          | 1.99933            | 4.21574 | 0.01368 | 6.22875 |
| H    | 46 | 0.21863           | 0.00000            | 0.77994 | 0.00144 | 0.78137 |



# Supplementary Material (ESI) for Dalton Transactions  
 # This journal is (c) The Royal Society of Chemistry 2009

|           |    |          |          |           |         |           |
|-----------|----|----------|----------|-----------|---------|-----------|
| H         | 47 | 0.20033  | 0.00000  | 0.79757   | 0.00210 | 0.79967   |
| C         | 48 | -0.22788 | 1.99934  | 4.21522   | 0.01332 | 6.22788   |
| H         | 49 | 0.21334  | 0.00000  | 0.78524   | 0.00142 | 0.78666   |
| H         | 50 | 0.20375  | 0.00000  | 0.79407   | 0.00218 | 0.79625   |
| N         | 51 | -0.59565 | 1.99960  | 5.57290   | 0.02315 | 7.59565   |
| C         | 52 | -0.41732 | 1.99943  | 4.40687   | 0.01102 | 6.41732   |
| H         | 53 | 0.18652  | 0.00000  | 0.81164   | 0.00184 | 0.81348   |
| H         | 54 | 0.24309  | 0.00000  | 0.75539   | 0.00151 | 0.75691   |
| H         | 55 | 0.20759  | 0.00000  | 0.79115   | 0.00126 | 0.79241   |
| C         | 56 | -0.41347 | 1.99944  | 4.40326   | 0.01077 | 6.41347   |
| H         | 57 | 0.20802  | 0.00000  | 0.79083   | 0.00114 | 0.79198   |
| H         | 58 | 0.23663  | 0.00000  | 0.76146   | 0.00191 | 0.76337   |
| H         | 59 | 0.18538  | 0.00000  | 0.81298   | 0.00164 | 0.81462   |
| C         | 60 | -0.04688 | 1.99910  | 4.02500   | 0.02278 | 6.04688   |
| C         | 61 | -0.54599 | 1.99930  | 4.49961   | 0.04708 | 6.54599   |
| H         | 62 | 0.19673  | 0.00000  | 0.80063   | 0.00264 | 0.80327   |
| C         | 63 | -0.20676 | 1.99932  | 4.19117   | 0.01627 | 6.20676   |
| H         | 64 | 0.17484  | 0.00000  | 0.82030   | 0.00486 | 0.82516   |
| C         | 65 | -0.37073 | 1.99939  | 4.33025   | 0.04109 | 6.37073   |
| H         | 66 | 0.19487  | 0.00000  | 0.80282   | 0.00232 | 0.80513   |
| C         | 67 | -0.49270 | 1.99923  | 4.46514   | 0.02834 | 6.49270   |
| H         | 68 | 0.19606  | 0.00000  | 0.80154   | 0.00240 | 0.80394   |
| =====     |    |          |          |           |         |           |
| * Total * |    | 0.01850  | 55.98166 | 149.33387 | 0.66597 | 205.98150 |

Natural Population

|                       |           |                    |
|-----------------------|-----------|--------------------|
| Core                  | 55.98166  | ( 99.9673% of 56)  |
| Valence               | 149.33387 | ( 99.5559% of 150) |
| Natural Minimal Basis | 205.31553 | ( 99.6677% of 206) |
| Natural Rydberg Basis | 0.66597   | ( 0.3233% of 206)  |

| Atom | No | Natural Electron Configuration    |
|------|----|-----------------------------------|
| Li   | 1  | [core]2S( 0.09)3d( 0.01)4p( 0.01) |
| N    | 2  | [core]2S( 1.31)2p( 4.25)4p( 0.01) |
| C    | 3  | [core]2S( 1.01)2p( 3.40)4p( 0.01) |
| H    | 4  | 1S( 0.78)                         |
| H    | 5  | 1S( 0.79)                         |
| H    | 6  | 1S( 0.81)                         |
| C    | 7  | [core]2S( 1.01)2p( 3.39)4p( 0.01) |
| H    | 8  | 1S( 0.81)                         |
| H    | 9  | 1S( 0.78)                         |
| H    | 10 | 1S( 0.78)                         |
| C    | 11 | [core]2S( 0.97)2p( 3.24)4p( 0.01) |
| H    | 12 | 1S( 0.78)                         |
| H    | 13 | 1S( 0.80)                         |
| C    | 14 | [core]2S( 0.97)2p( 3.24)4p( 0.01) |
| H    | 15 | 1S( 0.79)                         |
| H    | 16 | 1S( 0.79)                         |
| N    | 17 | [core]2S( 1.32)2p( 4.26)4p( 0.01) |
| C    | 18 | [core]2S( 1.01)2p( 3.39)4p( 0.01) |
| H    | 19 | 1S( 0.81)                         |
| H    | 20 | 1S( 0.76)                         |
| H    | 21 | 1S( 0.79)                         |
| C    | 22 | [core]2S( 1.01)2p( 3.39)4p( 0.01) |
| H    | 23 | 1S( 0.79)                         |
| H    | 24 | 1S( 0.76)                         |
| H    | 25 | 1S( 0.81)                         |

# Supplementary Material (ESI) for Dalton Transactions  
# This journal is (c) The Royal Society of Chemistry 2009

|    |    |                                            |
|----|----|--------------------------------------------|
| C  | 26 | [core]2S( 0.88)2p( 3.14)3p( 0.01)4p( 0.01) |
| C  | 27 | [core]2S( 0.92)2p( 3.56)4p( 0.03)          |
| H  | 28 | 1S( 0.80)                                  |
| C  | 29 | [core]2S( 0.93)2p( 3.37)4p( 0.02)          |
| H  | 30 | 1S( 0.80)                                  |
| C  | 31 | [core]2S( 0.93)2p( 3.38)4p( 0.02)          |
| H  | 32 | 1S( 0.80)                                  |
| C  | 33 | [core]2S( 0.92)2p( 3.55)4p( 0.02)          |
| H  | 34 | 1S( 0.80)                                  |
| Li | 35 | [core]2S( 0.09)3d( 0.01)4p( 0.01)          |
| N  | 36 | [core]2S( 1.31)2p( 4.25)4p( 0.01)          |
| C  | 37 | [core]2S( 1.01)2p( 3.40)4p( 0.01)          |
| H  | 38 | 1S( 0.78)                                  |
| H  | 39 | 1S( 0.79)                                  |
| H  | 40 | 1S( 0.81)                                  |
| C  | 41 | [core]2S( 1.01)2p( 3.39)4p( 0.01)          |
| H  | 42 | 1S( 0.81)                                  |
| H  | 43 | 1S( 0.78)                                  |
| H  | 44 | 1S( 0.78)                                  |
| C  | 45 | [core]2S( 0.97)2p( 3.24)4p( 0.01)          |
| H  | 46 | 1S( 0.78)                                  |
| H  | 47 | 1S( 0.80)                                  |
| C  | 48 | [core]2S( 0.97)2p( 3.24)4p( 0.01)          |
| H  | 49 | 1S( 0.79)                                  |
| H  | 50 | 1S( 0.79)                                  |
| N  | 51 | [core]2S( 1.32)2p( 4.26)4p( 0.01)          |
| C  | 52 | [core]2S( 1.01)2p( 3.39)4p( 0.01)          |
| H  | 53 | 1S( 0.81)                                  |
| H  | 54 | 1S( 0.76)                                  |
| H  | 55 | 1S( 0.79)                                  |
| C  | 56 | [core]2S( 1.01)2p( 3.39)4p( 0.01)          |
| H  | 57 | 1S( 0.79)                                  |
| H  | 58 | 1S( 0.76)                                  |
| H  | 59 | 1S( 0.81)                                  |
| C  | 60 | [core]2S( 0.88)2p( 3.15)3p( 0.01)4p( 0.01) |
| C  | 61 | [core]2S( 0.92)2p( 3.58)4p( 0.04)          |
| H  | 62 | 1S( 0.80)                                  |
| C  | 63 | [core]2S( 0.93)2p( 3.26)3p( 0.01)          |
| H  | 64 | 1S( 0.82)                                  |
| C  | 65 | [core]2S( 0.93)2p( 3.40)4p( 0.03)          |
| H  | 66 | 1S( 0.80)                                  |
| C  | 67 | [core]2S( 0.92)2p( 3.55)4p( 0.02)          |
| H  | 68 | 1S( 0.80)                                  |

1|1|UNPC-UNK|SP|RB3LYP|6-31+G(d,p)|C22H40Li2N4|PCUSER|28-Aug-2008|0|0|#  
B3LYP/6-31+G(D,P) POP=(NBO,FULL) GEOM=CONNECTIVITY INT=ULTRAFINE SCF=  
TIGHT|Single point on 2||0,1|Li|N,1,2.12275239|C,2,1.4592254  
3,1,106.58359672|H,3,0.95993404,2,109.47987106,1,68.7306377,0|H,3,0.95  
978992,2,109.45930829,1,-51.24126721,0|H,3,0.95990392,2,109.46293755,1  
, -171.2879933,0|C,2,1.45677212,1,116.24538622,3,122.11570946,0|H,7,0.9  
5997646,2,109.50539566,1,178.57829491,0|H,7,0.9598592,2,109.5146923,1,  
58.50375648,0|H,7,0.96069526,2,109.47933752,1,-61.46509045,0|C,2,1.468  
89305,1,103.84294701,3,-117.11645077,0|H,11,0.97023252,2,109.20467954,  
1,-79.46092451,0|H,11,0.96968767,2,109.20598111,1,162.69895523,0|C,11,  
1.50920707,2,111.99365366,1,41.60879241,0|H,14,0.96990107,11,109.37569  
001,2,66.31393929,0|H,14,0.96955258,11,109.33417399,2,-175.61174162,0|  
N,14,1.46397451,11,111.31579847,2,-54.66721341,0|C,17,1.46333286,14,11  
0.91788568,11,-78.12473783,0|H,18,0.95972205,17,109.47692249,14,-59.50  
667739,0|H,18,0.95978967,17,109.48126841,14,-179.5447939,0|H,18,0.9603

# Supplementary Material (ESI) for Dalton Transactions  
 # This journal is (c) The Royal Society of Chemistry 2009

```

3041,17,109.48165817,14,60.4845624,0|C,17,1.46103898,14,110.03736109,1
1,160.73763118,0|H,22,0.96023482,17,109.50323596,14,-59.76055302,0|H,2
2,0.96017707,17,109.43923217,14,-179.75373608,0|H,22,0.96006393,17,109
.48198252,14,60.24861259,0|C,1,2.61216876,2,145.37721711,7,-28.2831971
4,0|C,26,1.42140755,1,61.8640062,2,45.90731574,0|H,27,0.93007073,26,11
9.39920175,1,-115.26555427,0|C,27,1.43412045,26,121.23681398,1,64.7663
6099,0|H,29,0.93047313,27,120.21929297,26,164.8650778,0|C,29,1.3628367
1,27,119.52559339,26,-15.13703593,0|H,31,0.92983066,29,120.37102273,27
,-179.01109211,0|C,31,1.43624804,29,119.32314263,27,0.97132326,0|H,33,
0.92987985,31,119.29773231,29,-166.29894867,0|Li,26,2.60977624,1,147.6
3983696,2,-179.47269208,0|N,35,2.12275239,26,177.71876604,1,-7.5485209
8,0|C,36,1.45922543,35,106.58359672,26,157.50758299,0|H,37,0.95993404,
36,109.47987106,35,-68.7306377,0|H,37,0.95978992,36,109.45930829,35,51
.24126721,0|H,37,0.95990392,36,109.46293755,35,171.2879933,0|C,36,1.45
677212,35,116.24538622,26,35.39187353,0|H,41,0.95997646,36,109.5053956
6,35,-178.57829491,0|H,41,0.9598592,36,109.5146923,35,-58.50375648,0|H
,41,0.96069526,36,109.47933752,35,61.46509045,0|C,36,1.46889305,35,103
.84294701,26,-85.37596623,0|H,45,0.97023252,36,109.20467954,35,79.4609
2451,0|H,45,0.96968767,36,109.20598111,35,-162.69895523,0|C,45,1.50920
707,36,111.99365366,35,-41.60879241,0|H,48,0.96990107,45,109.37569001,
36,-66.31393929,0|H,48,0.96955258,45,109.33417399,36,175.61174162,0|N,
48,1.46397451,45,111.31579847,36,54.66721341,0|C,51,1.46333286,48,110.
91788568,45,78.12473783,0|H,52,0.95972205,51,109.47692249,48,59.506677
39,0|H,52,0.95978967,51,109.48126841,48,179.5447939,0|H,52,0.96033041,
51,109.48165817,48,-60.4845624,0|C,51,1.46103898,48,110.03736109,45,-1
60.73763118,0|H,56,0.96023482,51,109.50323596,48,59.76055302,0|H,56,0.
96017707,51,109.43923217,48,179.75373608,0|H,56,0.96006393,51,109.4819
8252,48,-60.24861259,0|C,33,1.41420858,31,121.45757832,29,13.7272786,0
|C,60,1.42140755,33,124.60868346,31,166.05739581,0|H,61,0.93007073,60,
119.39920175,33,-14.40723538,0|C,61,1.43412045,60,121.23681398,33,165.
56084937,0|H,63,0.93047313,61,120.21929297,60,-164.8650778,0|C,63,1.36
283671,61,119.52559339,60,15.13703593,0|H,65,0.92983066,63,120.3710227
3,61,179.01109211,0|C,26,1.41420858,1,136.98552198,2,-65.86852632,0|H,
67,0.92987985,26,119.24468425,1,98.16379666,0|| Version=IA32L-
G03RevC.02|State=1-AG|HF=-1095.9462555|RMSD=8.141e-009|Dipole=0.,0.,0.|PG=C
I [X(C22H40Li2N4)]||@
  
```

## 2.5. B3LYP/6-311++G(d,p)

Summary of Natural Population Analysis:

| Atom | No | Natural Charge | Natural Population |         |         |         |
|------|----|----------------|--------------------|---------|---------|---------|
|      |    |                | Core               | Valence | Rydberg | Total   |
| Li   | 1  | 0.84988        | 1.99894            | 0.11859 | 0.03260 | 2.15012 |
| N    | 2  | -0.57579       | 1.99956            | 5.54882 | 0.02740 | 7.57579 |
| C    | 3  | -0.31998       | 1.99900            | 4.30984 | 0.01114 | 6.31998 |
| H    | 4  | 0.18643        | 0.00000            | 0.81137 | 0.00219 | 0.81357 |
| H    | 5  | 0.17547        | 0.00000            | 0.82293 | 0.00160 | 0.82453 |
| H    | 6  | 0.15638        | 0.00000            | 0.84152 | 0.00210 | 0.84362 |
| C    | 7  | -0.31048       | 1.99900            | 4.30104 | 0.01044 | 6.31048 |
| H    | 8  | 0.15351        | 0.00000            | 0.84461 | 0.00188 | 0.84649 |
| H    | 9  | 0.18040        | 0.00000            | 0.81797 | 0.00162 | 0.81960 |
| H    | 10 | 0.18436        | 0.00000            | 0.81388 | 0.00176 | 0.81564 |
| C    | 11 | -0.14146       | 1.99892            | 4.12847 | 0.01407 | 6.14146 |
| H    | 12 | 0.17505        | 0.00000            | 0.82306 | 0.00190 | 0.82495 |
| H    | 13 | 0.15942        | 0.00000            | 0.83831 | 0.00227 | 0.84058 |

# Supplementary Material (ESI) for Dalton Transactions  
 # This journal is (c) The Royal Society of Chemistry 2009

|    |    |          |         |         |         |         |
|----|----|----------|---------|---------|---------|---------|
| C  | 14 | -0.14183 | 1.99893 | 4.12908 | 0.01381 | 6.14183 |
| H  | 15 | 0.17043  | 0.00000 | 0.82768 | 0.00188 | 0.82957 |
| H  | 16 | 0.16340  | 0.00000 | 0.83436 | 0.00224 | 0.83660 |
| N  | 17 | -0.57758 | 1.99956 | 5.55441 | 0.02361 | 7.57758 |
| C  | 18 | -0.31925 | 1.99898 | 4.30966 | 0.01060 | 6.31925 |
| H  | 19 | 0.15279  | 0.00000 | 0.84518 | 0.00204 | 0.84721 |
| H  | 20 | 0.20923  | 0.00000 | 0.78856 | 0.00220 | 0.79077 |
| H  | 21 | 0.17241  | 0.00000 | 0.82604 | 0.00156 | 0.82759 |
| C  | 22 | -0.31297 | 1.99898 | 4.30361 | 0.01038 | 6.31297 |
| H  | 23 | 0.17184  | 0.00000 | 0.82684 | 0.00132 | 0.82816 |
| H  | 24 | 0.20281  | 0.00000 | 0.79556 | 0.00163 | 0.79719 |
| H  | 25 | 0.15182  | 0.00000 | 0.84643 | 0.00175 | 0.84818 |
| C  | 26 | -0.04932 | 1.99910 | 4.02722 | 0.02299 | 6.04932 |
| C  | 27 | -0.48247 | 1.99908 | 4.44576 | 0.03764 | 6.48247 |
| H  | 28 | 0.16119  | 0.00000 | 0.83628 | 0.00252 | 0.83881 |
| C  | 29 | -0.28036 | 1.99919 | 4.25728 | 0.02389 | 6.28036 |
| H  | 30 | 0.15788  | 0.00000 | 0.83988 | 0.00224 | 0.84212 |
| C  | 31 | -0.28986 | 1.99919 | 4.26624 | 0.02442 | 6.28986 |
| H  | 32 | 0.15931  | 0.00000 | 0.83866 | 0.00203 | 0.84069 |
| C  | 33 | -0.46236 | 1.99907 | 4.42930 | 0.03399 | 6.46236 |
| H  | 34 | 0.16039  | 0.00000 | 0.83693 | 0.00268 | 0.83961 |
| Li | 35 | 0.84847  | 1.99894 | 0.11858 | 0.03401 | 2.15153 |
| N  | 36 | -0.57592 | 1.99956 | 5.54878 | 0.02758 | 7.57592 |
| C  | 37 | -0.32000 | 1.99900 | 4.30986 | 0.01114 | 6.32000 |
| H  | 38 | 0.18643  | 0.00000 | 0.81138 | 0.00220 | 0.81357 |
| H  | 39 | 0.17547  | 0.00000 | 0.82293 | 0.00160 | 0.82453 |
| H  | 40 | 0.15638  | 0.00000 | 0.84152 | 0.00210 | 0.84362 |
| C  | 41 | -0.31048 | 1.99900 | 4.30105 | 0.01044 | 6.31048 |
| H  | 42 | 0.15351  | 0.00000 | 0.84461 | 0.00188 | 0.84649 |
| H  | 43 | 0.18040  | 0.00000 | 0.81797 | 0.00162 | 0.81960 |
| H  | 44 | 0.18436  | 0.00000 | 0.81388 | 0.00176 | 0.81564 |
| C  | 45 | -0.14145 | 1.99892 | 4.12846 | 0.01408 | 6.14145 |
| H  | 46 | 0.17504  | 0.00000 | 0.82306 | 0.00190 | 0.82496 |
| H  | 47 | 0.15942  | 0.00000 | 0.83831 | 0.00227 | 0.84058 |
| C  | 48 | -0.14183 | 1.99893 | 4.12908 | 0.01382 | 6.14183 |
| H  | 49 | 0.17043  | 0.00000 | 0.82768 | 0.00188 | 0.82957 |
| H  | 50 | 0.16340  | 0.00000 | 0.83436 | 0.00224 | 0.83660 |
| N  | 51 | -0.57762 | 1.99956 | 5.55444 | 0.02362 | 7.57762 |
| C  | 52 | -0.31927 | 1.99898 | 4.30965 | 0.01063 | 6.31927 |
| H  | 53 | 0.15278  | 0.00000 | 0.84518 | 0.00204 | 0.84722 |
| H  | 54 | 0.20921  | 0.00000 | 0.78856 | 0.00224 | 0.79079 |
| H  | 55 | 0.17240  | 0.00000 | 0.82604 | 0.00156 | 0.82760 |
| C  | 56 | -0.31298 | 1.99898 | 4.30362 | 0.01038 | 6.31298 |
| H  | 57 | 0.17184  | 0.00000 | 0.82684 | 0.00132 | 0.82816 |
| H  | 58 | 0.20280  | 0.00000 | 0.79556 | 0.00164 | 0.79720 |
| H  | 59 | 0.15182  | 0.00000 | 0.84643 | 0.00175 | 0.84818 |
| C  | 60 | -0.04033 | 1.99908 | 4.01863 | 0.02263 | 6.04033 |
| C  | 61 | -0.48243 | 1.99908 | 4.44573 | 0.03763 | 6.48243 |
| H  | 62 | 0.16116  | 0.00000 | 0.83632 | 0.00253 | 0.83884 |
| C  | 63 | -0.28022 | 1.99919 | 4.25729 | 0.02374 | 6.28022 |
| H  | 64 | 0.15783  | 0.00000 | 0.83988 | 0.00229 | 0.84217 |
| C  | 65 | -0.29482 | 1.99921 | 4.27077 | 0.02483 | 6.29482 |
| H  | 66 | 0.15926  | 0.00000 | 0.83865 | 0.00209 | 0.84074 |
| C  | 67 | -0.44427 | 1.99879 | 4.41158 | 0.03390 | 6.44427 |
| H  | 68 | 0.15850  | 0.00000 | 0.83861 | 0.00289 | 0.84150 |

=====  
 \* Total \*      0.00000      55.97471      149.35068      0.67461      206.00000

Natural Population

-----  
 Core                      55.97471 ( 99.9548% of 56)

# Supplementary Material (ESI) for Dalton Transactions  
 # This journal is (c) The Royal Society of Chemistry 2009

Valence 149.35068 ( 99.5671% of 150)  
 Natural Minimal Basis 205.32539 ( 99.6725% of 206)  
 Natural Rydberg Basis 0.67461 ( 0.3275% of 206)

---

| Atom | No | Natural Electron Configuration             |
|------|----|--------------------------------------------|
| Li   | 1  | [core]2S( 0.12)3d( 0.01)4p( 0.02)5p( 0.01) |
| N    | 2  | [core]2S( 1.31)2p( 4.23)3p( 0.01)4p( 0.01) |
| C    | 3  | [core]2S( 0.97)2p( 3.34)3p( 0.01)          |
| H    | 4  | 1S( 0.81)                                  |
| H    | 5  | 1S( 0.82)                                  |
| H    | 6  | 1S( 0.84)                                  |
| C    | 7  | [core]2S( 0.97)2p( 3.33)                   |
| H    | 8  | 1S( 0.84)                                  |
| H    | 9  | 1S( 0.82)                                  |
| H    | 10 | 1S( 0.81)                                  |
| C    | 11 | [core]2S( 0.94)2p( 3.19)3p( 0.01)          |
| H    | 12 | 1S( 0.82)                                  |
| H    | 13 | 1S( 0.84)                                  |
| C    | 14 | [core]2S( 0.94)2p( 3.19)3p( 0.01)          |
| H    | 15 | 1S( 0.83)                                  |
| H    | 16 | 1S( 0.83)                                  |
| N    | 17 | [core]2S( 1.32)2p( 4.24)4p( 0.01)          |
| C    | 18 | [core]2S( 0.97)2p( 3.34)                   |
| H    | 19 | 1S( 0.85)                                  |
| H    | 20 | 1S( 0.79)                                  |
| H    | 21 | 1S( 0.83)                                  |
| C    | 22 | [core]2S( 0.97)2p( 3.34)                   |
| H    | 23 | 1S( 0.83)                                  |
| H    | 24 | 1S( 0.80)                                  |
| H    | 25 | 1S( 0.85)                                  |
| C    | 26 | [core]2S( 0.88)2p( 3.15)4p( 0.01)          |
| C    | 27 | [core]2S( 0.90)2p( 3.55)4p( 0.03)          |
| H    | 28 | 1S( 0.84)                                  |
| C    | 29 | [core]2S( 0.91)2p( 3.35)4p( 0.02)          |
| H    | 30 | 1S( 0.84)                                  |
| C    | 31 | [core]2S( 0.91)2p( 3.36)4p( 0.02)          |
| H    | 32 | 1S( 0.84)                                  |
| C    | 33 | [core]2S( 0.90)2p( 3.53)3p( 0.01)4p( 0.02) |
| H    | 34 | 1S( 0.84)                                  |
| Li   | 35 | [core]2S( 0.12)3d( 0.01)4p( 0.02)5p( 0.01) |
| N    | 36 | [core]2S( 1.31)2p( 4.23)3p( 0.01)4p( 0.01) |
| C    | 37 | [core]2S( 0.97)2p( 3.34)3p( 0.01)          |
| H    | 38 | 1S( 0.81)                                  |
| H    | 39 | 1S( 0.82)                                  |
| H    | 40 | 1S( 0.84)                                  |
| C    | 41 | [core]2S( 0.97)2p( 3.33)                   |
| H    | 42 | 1S( 0.84)                                  |
| H    | 43 | 1S( 0.82)                                  |
| H    | 44 | 1S( 0.81)                                  |
| C    | 45 | [core]2S( 0.94)2p( 3.19)3p( 0.01)          |
| H    | 46 | 1S( 0.82)                                  |
| H    | 47 | 1S( 0.84)                                  |
| C    | 48 | [core]2S( 0.94)2p( 3.19)3p( 0.01)          |
| H    | 49 | 1S( 0.83)                                  |
| H    | 50 | 1S( 0.83)                                  |
| N    | 51 | [core]2S( 1.32)2p( 4.24)4p( 0.01)          |
| C    | 52 | [core]2S( 0.97)2p( 3.34)                   |
| H    | 53 | 1S( 0.85)                                  |

# Supplementary Material (ESI) for Dalton Transactions  
# This journal is (c) The Royal Society of Chemistry 2009

|   |    |                                            |
|---|----|--------------------------------------------|
| H | 54 | 1S( 0.79)                                  |
| H | 55 | 1S( 0.83)                                  |
| C | 56 | [core]2S( 0.97)2p( 3.34)                   |
| H | 57 | 1S( 0.83)                                  |
| H | 58 | 1S( 0.80)                                  |
| H | 59 | 1S( 0.85)                                  |
| C | 60 | [core]2S( 0.87)2p( 3.14)4p( 0.01)          |
| C | 61 | [core]2S( 0.90)2p( 3.55)4p( 0.03)          |
| H | 62 | 1S( 0.84)                                  |
| C | 63 | [core]2S( 0.91)2p( 3.35)4p( 0.02)          |
| H | 64 | 1S( 0.84)                                  |
| C | 65 | [core]2S( 0.91)2p( 3.36)4p( 0.02)          |
| H | 66 | 1S( 0.84)                                  |
| C | 67 | [core]2S( 0.88)2p( 3.53)3p( 0.01)4p( 0.02) |
| H | 68 | 1S( 0.84)                                  |

NBO analysis skipped by request.

```
1|1|UNPC-UNK|SP|RB3LYP|6-311++G(d,p)|C22H40Li2N4|PCUSER|03-Sep-2008|0|
|# B3LYP/6-311++G(D,P) POP=(NPA,FULL) GEOM=CONNECTIVITY SCF=TIGHT INT=
ULTRAFINE||Single point on 2||0,1|Li|N,1,2.12275239|C,2,1.45922543,1
,106.58359672|H,3,0.95993404,2,109.47987106,1,68.7306377,0|H,3,0.95978
992,2,109.45930829,1,-51.24126721,0|H,3,0.95990392,2,109.46293755,1,-1
71.2879933,0|C,2,1.45677212,1,116.24538622,3,122.11570946,0|H,7,0.9599
7646,2,109.50539566,1,178.57829491,0|H,7,0.9598592,2,109.5146923,1,58.
50375648,0|H,7,0.96069526,2,109.47933752,1,-61.46509045,0|C,2,1.468893
05,1,103.84294701,3,-117.11645077,0|H,11,0.97023252,2,109.20467954,1,-
79.46092451,0|H,11,0.96968767,2,109.20598111,1,162.69895523,0|C,11,1.5
0920707,2,111.99365366,1,41.60879241,0|H,14,0.96990107,11,109.37569001
,2,66.31393929,0|H,14,0.96955258,11,109.33417399,2,-175.61174162,0|N,1
4,1.46397451,11,111.31579847,2,-54.66721341,0|C,17,1.46333286,14,110.9
1788568,11,-78.12473783,0|H,18,0.95972205,17,109.47692249,14,-59.50667
739,0|H,18,0.95978967,17,109.48126841,14,-179.5447939,0|H,18,0.9603304
1,17,109.48165817,14,60.4845624,0|C,17,1.46103898,14,110.03736109,11,1
60.73763118,0|H,22,0.96023482,17,109.50323596,14,-59.76055302,0|H,22,0
.96017707,17,109.43923217,14,-179.75373608,0|H,22,0.96006393,17,109.48
198252,14,60.24861259,0|C,1,2.61216876,2,145.37721711,7,-28.28319714,0
|C,26,1.42140755,1,61.8640062,2,45.90731574,0|H,27,0.93007073,26,119.3
9920175,1,-115.26555427,0|C,27,1.43412045,26,121.23681398,1,64.7663609
9,0|H,29,0.93047313,27,120.21929297,26,164.8650778,0|C,29,1.36283671,2
7,119.52559339,26,-15.13703593,0|H,31,0.92983066,29,120.37102273,27,-1
79.01109211,0|C,31,1.43624804,29,119.32314263,27,0.97132326,0|H,33,0.9
2987985,31,119.29773231,29,-166.29894867,0|Li,26,2.60977624,1,147.6398
3696,2,-179.47269208,0|N,35,2.12275239,26,177.71876604,1,-7.54852098,0
|C,36,1.45922543,35,106.58359672,26,157.50758299,0|H,37,0.95993404,36,
109.47987106,35,-68.7306377,0|H,37,0.95978992,36,109.45930829,35,51.24
126721,0|H,37,0.95990392,36,109.46293755,35,171.2879933,0|C,36,1.45677
212,35,116.24538622,26,35.39187353,0|H,41,0.95997646,36,109.50539566,3
5,-178.57829491,0|H,41,0.9598592,36,109.5146923,35,-58.50375648,0|H,41
,0.96069526,36,109.47933752,35,61.46509045,0|C,36,1.46889305,35,103.84
294701,26,-85.37596623,0|H,45,0.97023252,36,109.20467954,35,79.4609245
1,0|H,45,0.96968767,36,109.20598111,35,-162.69895523,0|C,45,1.50920707
,36,111.99365366,35,-41.60879241,0|H,48,0.96990107,45,109.37569001,36,
-66.31393929,0|H,48,0.96955258,45,109.33417399,36,175.61174162,0|N,48,
1.46397451,45,111.31579847,36,54.66721341,0|C,51,1.46333286,48,110.917
88568,45,78.12473783,0|H,52,0.95972205,51,109.47692249,48,59.50667739,
0|H,52,0.95978967,51,109.48126841,48,179.5447939,0|H,52,0.96033041,51,
109.48165817,48,-60.4845624,0|C,51,1.46103898,48,110.03736109,45,-160.
73763118,0|H,56,0.96023482,51,109.50323596,48,59.76055302,0|H,56,0.960
17707,51,109.43923217,48,179.75373608,0|H,56,0.96006393,51,109.4819825
2,48,-60.24861259,0|C,33,1.41420858,31,121.45757832,29,13.7272786,0|C,
```

# Supplementary Material (ESI) for Dalton Transactions  
 # This journal is (c) The Royal Society of Chemistry 2009

60,1.42140755,33,124.60868346,31,166.05739581,0|H,61,0.93007073,60,119  
 .39920175,33,-14.40723538,0|C,61,1.43412045,60,121.23681398,33,165.560  
 84937,0|H,63,0.93047313,61,120.21929297,60,-164.8650778,0|C,63,1.36283  
 671,61,119.52559339,60,15.13703593,0|H,65,0.92983066,63,120.37102273,6  
 1,179.01109211,0|C,26,1.41420858,1,136.98552198,2,-65.86852632,0|H,67,  
 0.92987985,26,119.24468425,1,98.16379666,0|| Version=IA32L-  
 G03RevC.02|State=1-AG|HF=-1096.1832043|RMSD=3.221e-009|Dipole=0.,0.,0. |  
 PG=CI [X(C22H40Li2N4)]||@

## 2.6. MP2/LANL2DZ

Summary of Natural Population Analysis:

| Atom | No | Natural<br>Charge | Natural Population |         |         |         |
|------|----|-------------------|--------------------|---------|---------|---------|
|      |    |                   | Core               | Valence | Rydberg | Total   |
| Li   | 1  | 0.91915           | 1.99835            | 0.05909 | 0.02341 | 2.08085 |
| N    | 2  | -0.58448          | 1.99971            | 5.56859 | 0.01618 | 7.58448 |
| C    | 3  | -0.29935          | 1.99927            | 4.28864 | 0.01144 | 6.29935 |
| H    | 4  | 0.18239           | 0.00000            | 0.81611 | 0.00151 | 0.81761 |
| H    | 5  | 0.16994           | 0.00000            | 0.82876 | 0.00130 | 0.83006 |
| H    | 6  | 0.14402           | 0.00000            | 0.85276 | 0.00323 | 0.85598 |
| C    | 7  | -0.28967          | 1.99927            | 4.27923 | 0.01117 | 6.28967 |
| H    | 8  | 0.14149           | 0.00000            | 0.85536 | 0.00315 | 0.85851 |
| H    | 9  | 0.17657           | 0.00000            | 0.82219 | 0.00124 | 0.82343 |
| H    | 10 | 0.18001           | 0.00000            | 0.81864 | 0.00134 | 0.81999 |
| C    | 11 | -0.12297          | 1.99919            | 4.10415 | 0.01963 | 6.12297 |
| H    | 12 | 0.16831           | 0.00000            | 0.82968 | 0.00202 | 0.83169 |
| H    | 13 | 0.14801           | 0.00000            | 0.84830 | 0.00370 | 0.85199 |
| C    | 14 | -0.12272          | 1.99920            | 4.10433 | 0.01919 | 6.12272 |
| H    | 15 | 0.16224           | 0.00000            | 0.83569 | 0.00206 | 0.83776 |
| H    | 16 | 0.15222           | 0.00000            | 0.84417 | 0.00361 | 0.84778 |
| N    | 17 | -0.59159          | 1.99971            | 5.57612 | 0.01575 | 7.59159 |
| C    | 18 | -0.29543          | 1.99925            | 4.28332 | 0.01286 | 6.29543 |
| H    | 19 | 0.14086           | 0.00000            | 0.85619 | 0.00295 | 0.85914 |
| H    | 20 | 0.20118           | 0.00000            | 0.79615 | 0.00267 | 0.79882 |
| H    | 21 | 0.16702           | 0.00000            | 0.83177 | 0.00121 | 0.83298 |
| C    | 22 | -0.29005          | 1.99925            | 4.27888 | 0.01192 | 6.29005 |
| H    | 23 | 0.16632           | 0.00000            | 0.83247 | 0.00122 | 0.83368 |
| H    | 24 | 0.19855           | 0.00000            | 0.79974 | 0.00171 | 0.80145 |
| H    | 25 | 0.13965           | 0.00000            | 0.85739 | 0.00296 | 0.86035 |
| C    | 26 | -0.00336          | 1.99914            | 3.97912 | 0.02510 | 6.00336 |
| C    | 27 | -0.52870          | 1.99919            | 4.48228 | 0.04723 | 6.52870 |
| H    | 28 | 0.15761           | 0.00000            | 0.84073 | 0.00166 | 0.84239 |
| C    | 29 | -0.26241          | 1.99932            | 4.23420 | 0.02889 | 6.26241 |
| H    | 30 | 0.14957           | 0.00000            | 0.84872 | 0.00172 | 0.85043 |
| C    | 31 | -0.27847          | 1.99932            | 4.24898 | 0.03017 | 6.27847 |
| H    | 32 | 0.15108           | 0.00000            | 0.84727 | 0.00165 | 0.84892 |
| C    | 33 | -0.50281          | 1.99918            | 4.46158 | 0.04205 | 6.50281 |
| H    | 34 | 0.15583           | 0.00000            | 0.84241 | 0.00176 | 0.84417 |
| Li   | 35 | 0.91915           | 1.99835            | 0.05909 | 0.02341 | 2.08085 |
| N    | 36 | -0.58448          | 1.99971            | 5.56859 | 0.01618 | 7.58448 |
| C    | 37 | -0.29935          | 1.99927            | 4.28864 | 0.01144 | 6.29935 |
| H    | 38 | 0.18239           | 0.00000            | 0.81611 | 0.00151 | 0.81761 |
| H    | 39 | 0.16994           | 0.00000            | 0.82876 | 0.00130 | 0.83006 |
| H    | 40 | 0.14402           | 0.00000            | 0.85276 | 0.00323 | 0.85598 |
| C    | 41 | -0.28967          | 1.99927            | 4.27923 | 0.01117 | 6.28967 |
| H    | 42 | 0.14149           | 0.00000            | 0.85536 | 0.00315 | 0.85851 |

# Supplementary Material (ESI) for Dalton Transactions  
 # This journal is (c) The Royal Society of Chemistry 2009

|           |    |          |          |           |         |           |
|-----------|----|----------|----------|-----------|---------|-----------|
| H         | 43 | 0.17657  | 0.00000  | 0.82219   | 0.00124 | 0.82343   |
| H         | 44 | 0.18001  | 0.00000  | 0.81864   | 0.00134 | 0.81999   |
| C         | 45 | -0.12297 | 1.99919  | 4.10415   | 0.01963 | 6.12297   |
| H         | 46 | 0.16831  | 0.00000  | 0.82968   | 0.00202 | 0.83169   |
| H         | 47 | 0.14801  | 0.00000  | 0.84830   | 0.00370 | 0.85199   |
| C         | 48 | -0.12272 | 1.99920  | 4.10433   | 0.01919 | 6.12272   |
| H         | 49 | 0.16224  | 0.00000  | 0.83569   | 0.00206 | 0.83776   |
| H         | 50 | 0.15222  | 0.00000  | 0.84417   | 0.00361 | 0.84778   |
| N         | 51 | -0.59159 | 1.99971  | 5.57612   | 0.01575 | 7.59159   |
| C         | 52 | -0.29543 | 1.99925  | 4.28332   | 0.01286 | 6.29543   |
| H         | 53 | 0.14086  | 0.00000  | 0.85619   | 0.00295 | 0.85914   |
| H         | 54 | 0.20118  | 0.00000  | 0.79615   | 0.00267 | 0.79882   |
| H         | 55 | 0.16702  | 0.00000  | 0.83177   | 0.00121 | 0.83298   |
| C         | 56 | -0.29005 | 1.99925  | 4.27888   | 0.01192 | 6.29005   |
| H         | 57 | 0.16632  | 0.00000  | 0.83247   | 0.00122 | 0.83368   |
| H         | 58 | 0.19855  | 0.00000  | 0.79974   | 0.00171 | 0.80145   |
| H         | 59 | 0.13965  | 0.00000  | 0.85739   | 0.00296 | 0.86035   |
| C         | 60 | -0.00336 | 1.99914  | 3.97912   | 0.02510 | 6.00336   |
| C         | 61 | -0.52870 | 1.99919  | 4.48228   | 0.04723 | 6.52870   |
| H         | 62 | 0.15761  | 0.00000  | 0.84073   | 0.00166 | 0.84239   |
| C         | 63 | -0.26241 | 1.99932  | 4.23420   | 0.02889 | 6.26241   |
| H         | 64 | 0.14957  | 0.00000  | 0.84872   | 0.00172 | 0.85043   |
| C         | 65 | -0.27847 | 1.99932  | 4.24898   | 0.03017 | 6.27847   |
| H         | 66 | 0.15108  | 0.00000  | 0.84727   | 0.00165 | 0.84892   |
| C         | 67 | -0.50281 | 1.99918  | 4.46158   | 0.04205 | 6.50281   |
| H         | 68 | 0.15583  | 0.00000  | 0.84241   | 0.00176 | 0.84417   |
| =====     |    |          |          |           |         |           |
| * Total * |    | 0.00000  | 55.97872 | 149.30598 | 0.71530 | 206.00000 |

Natural Population

|                       |           |                    |
|-----------------------|-----------|--------------------|
| Core                  | 55.97872  | ( 99.9620% of 56)  |
| Valence               | 149.30598 | ( 99.5373% of 150) |
| Natural Minimal Basis | 205.28470 | ( 99.6528% of 206) |
| Natural Rydberg Basis | 0.71530   | ( 0.3472% of 206)  |

Atom No Natural Electron Configuration

|    |    |                                   |
|----|----|-----------------------------------|
| Li | 1  | [core]2S( 0.06)3p( 0.02)          |
| N  | 2  | [core]2S( 1.34)2p( 4.22)3p( 0.02) |
| C  | 3  | [core]2S( 0.98)2p( 3.30)3p( 0.01) |
| H  | 4  | 1S( 0.82)                         |
| H  | 5  | 1S( 0.83)                         |
| H  | 6  | 1S( 0.85)                         |
| C  | 7  | [core]2S( 0.98)2p( 3.30)3p( 0.01) |
| H  | 8  | 1S( 0.86)                         |
| H  | 9  | 1S( 0.82)                         |
| H  | 10 | 1S( 0.82)                         |
| C  | 11 | [core]2S( 0.96)2p( 3.15)3p( 0.02) |
| H  | 12 | 1S( 0.83)                         |
| H  | 13 | 1S( 0.85)                         |
| C  | 14 | [core]2S( 0.95)2p( 3.15)3p( 0.02) |
| H  | 15 | 1S( 0.84)                         |
| H  | 16 | 1S( 0.84)                         |
| N  | 17 | [core]2S( 1.35)2p( 4.23)3p( 0.02) |
| C  | 18 | [core]2S( 0.98)2p( 3.30)3p( 0.01) |
| H  | 19 | 1S( 0.86)                         |
| H  | 20 | 1S( 0.80)                         |
| H  | 21 | 1S( 0.83)                         |



# Supplementary Material (ESI) for Dalton Transactions  
# This journal is (c) The Royal Society of Chemistry 2009

```
C 22 [core]2S( 0.98)2p( 3.30)3p( 0.01)
H 23 1S( 0.83)
H 24 1S( 0.80)
H 25 1S( 0.86)
C 26 [core]2S( 0.90)2p( 3.08)3p( 0.02)
C 27 [core]2S( 0.92)2p( 3.56)3p( 0.05)
H 28 1S( 0.84)
C 29 [core]2S( 0.93)2p( 3.30)3p( 0.03)
H 30 1S( 0.85)
C 31 [core]2S( 0.93)2p( 3.31)3p( 0.03)
H 32 1S( 0.85)
C 33 [core]2S( 0.92)2p( 3.54)3p( 0.04)
H 34 1S( 0.84)
Li 35 [core]2S( 0.06)3p( 0.02)
N 36 [core]2S( 1.34)2p( 4.22)3p( 0.02)
C 37 [core]2S( 0.98)2p( 3.30)3p( 0.01)
H 38 1S( 0.82)
H 39 1S( 0.83)
H 40 1S( 0.85)
C 41 [core]2S( 0.98)2p( 3.30)3p( 0.01)
H 42 1S( 0.86)
H 43 1S( 0.82)
H 44 1S( 0.82)
C 45 [core]2S( 0.96)2p( 3.15)3p( 0.02)
H 46 1S( 0.83)
H 47 1S( 0.85)
C 48 [core]2S( 0.95)2p( 3.15)3p( 0.02)
H 49 1S( 0.84)
H 50 1S( 0.84)
N 51 [core]2S( 1.35)2p( 4.23)3p( 0.02)
C 52 [core]2S( 0.98)2p( 3.30)3p( 0.01)
H 53 1S( 0.86)
H 54 1S( 0.80)
H 55 1S( 0.83)
C 56 [core]2S( 0.98)2p( 3.30)3p( 0.01)
H 57 1S( 0.83)
H 58 1S( 0.80)
H 59 1S( 0.86)
C 60 [core]2S( 0.90)2p( 3.08)3p( 0.02)
C 61 [core]2S( 0.92)2p( 3.56)3p( 0.05)
H 62 1S( 0.84)
C 63 [core]2S( 0.93)2p( 3.30)3p( 0.03)
H 64 1S( 0.85)
C 65 [core]2S( 0.93)2p( 3.31)3p( 0.03)
H 66 1S( 0.85)
C 67 [core]2S( 0.92)2p( 3.54)3p( 0.04)
H 68 1S( 0.84)
```

NBO analysis skipped by request.

```
1|1|UNPC-UNK|SP|RMP2-FU|LANL2DZ|C22H40Li2N4|PCUSER|02-Sep-2008|0||# MP
2=FULL/LANL2DZ POP=(NPA,FULL) GEOM=CONNECTIVITY SCF=TIGHT INT=ULTRAFIN
E|Single point on 2||0,1|Li|N,1,2.12275239|C,2,1.45922543,1,106.583
59672|H,3,0.95993404,2,109.47987106,1,68.7306377,0|H,3,0.95978992,2,10
9.45930829,1,-51.24126721,0|H,3,0.95990392,2,109.46293755,1,-171.28799
33,0|C,2,1.45677212,1,116.24538622,3,122.11570946,0|H,7,0.95997646,2,1
09.50539566,1,178.57829491,0|H,7,0.9598592,2,109.5146923,1,58.50375648
,0|H,7,0.96069526,2,109.47933752,1,-61.46509045,0|C,2,1.46889305,1,103
.84294701,3,-117.11645077,0|H,11,0.97023252,2,109.20467954,1,-79.46092
451,0|H,11,0.96968767,2,109.20598111,1,162.69895523,0|C,11,1.50920707,
2,111.99365366,1,41.60879241,0|H,14,0.96990107,11,109.37569001,2,66.31
```

# Supplementary Material (ESI) for Dalton Transactions  
 # This journal is (c) The Royal Society of Chemistry 2009

```

393929,0|H,14,0.96955258,11,109.33417399,2,-175.61174162,0|N,14,1.4639
7451,11,111.31579847,2,-54.66721341,0|C,17,1.46333286,14,110.91788568,
11,-78.12473783,0|H,18,0.95972205,17,109.47692249,14,-59.50667739,0|H,
18,0.95978967,17,109.48126841,14,-179.5447939,0|H,18,0.96033041,17,109
.48165817,14,60.4845624,0|C,17,1.46103898,14,110.03736109,11,160.73763
118,0|H,22,0.96023482,17,109.50323596,14,-59.76055302,0|H,22,0.9601770
7,17,109.43923217,14,-179.75373608,0|H,22,0.96006393,17,109.48198252,1
4,60.24861259,0|C,1,2.61216876,2,145.37721711,7,-28.28319714,0|C,26,1.
42140755,1,61.8640062,2,45.90731574,0|H,27,0.93007073,26,119.39920175,
1,-115.26555427,0|C,27,1.43412045,26,121.23681398,1,64.76636099,0|H,29
,0.93047313,27,120.21929297,26,164.8650778,0|C,29,1.36283671,27,119.52
559339,26,-15.13703593,0|H,31,0.92983066,29,120.37102273,27,-179.01109
211,0|C,31,1.43624804,29,119.32314263,27,0.97132326,0|H,33,0.92987985,
31,119.29773231,29,-166.29894867,0|Li,26,2.60977624,1,147.63983696,2,-
179.47269208,0|N,35,2.12275239,26,177.71876604,1,-7.54852098,0|C,36,1.
45922543,35,106.58359672,26,157.50758299,0|H,37,0.95993404,36,109.4798
7106,35,-68.7306377,0|H,37,0.95978992,36,109.45930829,35,51.24126721,0
|H,37,0.95990392,36,109.46293755,35,171.2879933,0|C,36,1.45677212,35,1
16.24538622,26,35.39187353,0|H,41,0.95997646,36,109.50539566,35,-178.5
7829491,0|H,41,0.9598592,36,109.5146923,35,-58.50375648,0|H,41,0.96069
526,36,109.47933752,35,61.46509045,0|C,36,1.46889305,35,103.84294701,2
6,-85.37596623,0|H,45,0.97023252,36,109.20467954,35,79.46092451,0|H,45
,0.96968767,36,109.20598111,35,-162.69895523,0|C,45,1.50920707,36,111.
99365366,35,-41.60879241,0|H,48,0.96990107,45,109.37569001,36,-66.3139
3929,0|H,48,0.96955258,45,109.33417399,36,175.61174162,0|N,48,1.463974
51,45,111.31579847,36,54.66721341,0|C,51,1.46333286,48,110.91788568,45
,78.12473783,0|H,52,0.95972205,51,109.47692249,48,59.50667739,0|H,52,0
.95978967,51,109.48126841,48,179.5447939,0|H,52,0.96033041,51,109.4816
5817,48,-60.4845624,0|C,51,1.46103898,48,110.03736109,45,-160.73763118
,0|H,56,0.96023482,51,109.50323596,48,59.76055302,0|H,56,0.96017707,51
,109.43923217,48,179.75373608,0|H,56,0.96006393,51,109.48198252,48,-60
.24861259,0|C,33,1.41420858,31,121.45757832,29,13.7272786,0|C,60,1.421
40755,33,124.60868346,31,166.05739581,0|H,61,0.93007073,60,119.3992017
5,33,-14.40723538,0|C,61,1.43412045,60,121.23681398,33,165.56084937,0|
H,63,0.93047313,61,120.21929297,60,-164.8650778,0|C,63,1.36283671,61,1
19.52559339,60,15.13703593,0|H,65,0.92983066,63,120.37102273,61,179.01
109211,0|C,26,1.41420858,1,136.98552198,2,-65.86852632,0|H,67,0.929879
85,26,119.24468425,1,98.16379666,0||Version=IA32L-G03RevC.02|State
=1-AG|HF=-1088.1227078|MP2=-1090.3693094|RMSD=4.952e-009|PG=CI[X(C22H
40Li2N4)]|@
  
```

## 2.7. MP2/6-31+G(d)

Summary of Natural Population Analysis:

| Atom | No | Natural Charge | Natural Population |         |         |         |
|------|----|----------------|--------------------|---------|---------|---------|
|      |    |                | Core               | Valence | Rydberg | Total   |
| Li   | 1  | 0.89105        | 1.99920            | 0.08367 | 0.02609 | 2.10895 |
| N    | 2  | -0.65131       | 1.99961            | 5.62582 | 0.02588 | 7.65131 |
| C    | 3  | -0.32278       | 1.99951            | 4.30841 | 0.01486 | 6.32278 |
| H    | 4  | 0.19581        | 0.00000            | 0.80257 | 0.00162 | 0.80419 |
| H    | 5  | 0.18482        | 0.00000            | 0.81445 | 0.00074 | 0.81518 |
| H    | 6  | 0.16578        | 0.00000            | 0.83352 | 0.00070 | 0.83422 |
| C    | 7  | -0.31593       | 1.99951            | 4.30195 | 0.01447 | 6.31593 |
| H    | 8  | 0.16281        | 0.00000            | 0.83656 | 0.00063 | 0.83719 |
| H    | 9  | 0.19091        | 0.00000            | 0.80819 | 0.00090 | 0.80909 |
| H    | 10 | 0.19454        | 0.00000            | 0.80452 | 0.00094 | 0.80546 |

# Supplementary Material (ESI) for Dalton Transactions  
 # This journal is (c) The Royal Society of Chemistry 2009

|    |    |          |         |         |         |         |
|----|----|----------|---------|---------|---------|---------|
| C  | 11 | -0.16092 | 1.99938 | 4.14386 | 0.01768 | 6.16092 |
| H  | 12 | 0.19390  | 0.00000 | 0.80537 | 0.00073 | 0.80610 |
| H  | 13 | 0.17582  | 0.00000 | 0.82348 | 0.00070 | 0.82418 |
| C  | 14 | -0.16005 | 1.99939 | 4.14323 | 0.01742 | 6.16005 |
| H  | 15 | 0.18822  | 0.00000 | 0.81104 | 0.00075 | 0.81178 |
| H  | 16 | 0.17943  | 0.00000 | 0.81983 | 0.00074 | 0.82057 |
| N  | 17 | -0.65631 | 1.99961 | 5.63187 | 0.02483 | 7.65631 |
| C  | 18 | -0.32121 | 1.99949 | 4.30706 | 0.01467 | 6.32121 |
| H  | 19 | 0.16178  | 0.00000 | 0.83754 | 0.00068 | 0.83822 |
| H  | 20 | 0.21885  | 0.00000 | 0.78019 | 0.00096 | 0.78115 |
| H  | 21 | 0.18159  | 0.00000 | 0.81773 | 0.00068 | 0.81841 |
| C  | 22 | -0.31768 | 1.99950 | 4.30367 | 0.01451 | 6.31768 |
| H  | 23 | 0.18139  | 0.00000 | 0.81807 | 0.00053 | 0.81861 |
| H  | 24 | 0.21339  | 0.00000 | 0.78555 | 0.00107 | 0.78661 |
| H  | 25 | 0.16058  | 0.00000 | 0.83883 | 0.00059 | 0.83942 |
| C  | 26 | 0.01734  | 1.99909 | 3.95555 | 0.02802 | 5.98266 |
| C  | 27 | -0.55591 | 1.99926 | 4.51566 | 0.04099 | 6.55591 |
| H  | 28 | 0.18370  | 0.00000 | 0.81532 | 0.00098 | 0.81630 |
| C  | 29 | -0.28151 | 1.99931 | 4.24943 | 0.03277 | 6.28151 |
| H  | 30 | 0.17570  | 0.00000 | 0.82341 | 0.00089 | 0.82430 |
| C  | 31 | -0.29622 | 1.99932 | 4.26378 | 0.03313 | 6.29622 |
| H  | 32 | 0.17706  | 0.00000 | 0.82203 | 0.00091 | 0.82294 |
| C  | 33 | -0.53695 | 1.99925 | 4.49900 | 0.03870 | 6.53695 |
| H  | 34 | 0.18233  | 0.00000 | 0.81661 | 0.00106 | 0.81767 |
| Li | 35 | 0.89105  | 1.99920 | 0.08367 | 0.02609 | 2.10895 |
| N  | 36 | -0.65131 | 1.99961 | 5.62582 | 0.02588 | 7.65131 |
| C  | 37 | -0.32278 | 1.99951 | 4.30841 | 0.01486 | 6.32278 |
| H  | 38 | 0.19581  | 0.00000 | 0.80257 | 0.00162 | 0.80419 |
| H  | 39 | 0.18482  | 0.00000 | 0.81445 | 0.00074 | 0.81518 |
| H  | 40 | 0.16578  | 0.00000 | 0.83352 | 0.00070 | 0.83422 |
| C  | 41 | -0.31593 | 1.99951 | 4.30195 | 0.01447 | 6.31593 |
| H  | 42 | 0.16281  | 0.00000 | 0.83656 | 0.00063 | 0.83719 |
| H  | 43 | 0.19091  | 0.00000 | 0.80819 | 0.00090 | 0.80909 |
| H  | 44 | 0.19454  | 0.00000 | 0.80452 | 0.00094 | 0.80546 |
| C  | 45 | -0.16092 | 1.99938 | 4.14386 | 0.01768 | 6.16092 |
| H  | 46 | 0.19390  | 0.00000 | 0.80537 | 0.00073 | 0.80610 |
| H  | 47 | 0.17582  | 0.00000 | 0.82348 | 0.00070 | 0.82418 |
| C  | 48 | -0.16005 | 1.99939 | 4.14323 | 0.01742 | 6.16005 |
| H  | 49 | 0.18822  | 0.00000 | 0.81104 | 0.00075 | 0.81178 |
| H  | 50 | 0.17943  | 0.00000 | 0.81983 | 0.00074 | 0.82057 |
| N  | 51 | -0.65631 | 1.99961 | 5.63187 | 0.02483 | 7.65631 |
| C  | 52 | -0.32121 | 1.99949 | 4.30706 | 0.01467 | 6.32121 |
| H  | 53 | 0.16178  | 0.00000 | 0.83754 | 0.00068 | 0.83822 |
| H  | 54 | 0.21885  | 0.00000 | 0.78019 | 0.00096 | 0.78115 |
| H  | 55 | 0.18159  | 0.00000 | 0.81773 | 0.00068 | 0.81841 |
| C  | 56 | -0.31768 | 1.99950 | 4.30367 | 0.01451 | 6.31768 |
| H  | 57 | 0.18139  | 0.00000 | 0.81807 | 0.00053 | 0.81861 |
| H  | 58 | 0.21339  | 0.00000 | 0.78555 | 0.00107 | 0.78661 |
| H  | 59 | 0.16058  | 0.00000 | 0.83883 | 0.00059 | 0.83942 |
| C  | 60 | 0.01734  | 1.99909 | 3.95555 | 0.02802 | 5.98266 |
| C  | 61 | -0.55591 | 1.99926 | 4.51566 | 0.04099 | 6.55591 |
| H  | 62 | 0.18370  | 0.00000 | 0.81532 | 0.00098 | 0.81630 |
| C  | 63 | -0.28151 | 1.99931 | 4.24943 | 0.03277 | 6.28151 |
| H  | 64 | 0.17570  | 0.00000 | 0.82341 | 0.00089 | 0.82430 |
| C  | 65 | -0.29622 | 1.99932 | 4.26378 | 0.03313 | 6.29622 |
| H  | 66 | 0.17706  | 0.00000 | 0.82203 | 0.00091 | 0.82294 |
| C  | 67 | -0.53695 | 1.99925 | 4.49900 | 0.03870 | 6.53695 |
| H  | 68 | 0.18233  | 0.00000 | 0.81661 | 0.00106 | 0.81767 |

=====  
 \* Total \*      0.00000      55.98283      149.29552      0.72165      206.00000

Natural Population

|                       |           |                    |
|-----------------------|-----------|--------------------|
| Core                  | 55.98283  | ( 99.9693% of 56)  |
| Valence               | 149.29552 | ( 99.5303% of 150) |
| Natural Minimal Basis | 205.27835 | ( 99.6497% of 206) |
| Natural Rydberg Basis | 0.72165   | ( 0.3503% of 206)  |

Atom No Natural Electron Configuration

|    |    |                                                     |
|----|----|-----------------------------------------------------|
| Li | 1  | [core]2S( 0.08)3d( 0.01)4p( 0.01)                   |
| N  | 2  | [core]2S( 1.32)2p( 4.31)3d( 0.01)4p( 0.02)          |
| C  | 3  | [core]2S( 1.01)2p( 3.30)3d( 0.01)4p( 0.01)          |
| H  | 4  | 1S( 0.80)                                           |
| H  | 5  | 1S( 0.81)                                           |
| H  | 6  | 1S( 0.83)                                           |
| C  | 7  | [core]2S( 1.01)2p( 3.30)3d( 0.01)4p( 0.01)          |
| H  | 8  | 1S( 0.84)                                           |
| H  | 9  | 1S( 0.81)                                           |
| H  | 10 | 1S( 0.80)                                           |
| C  | 11 | [core]2S( 0.97)2p( 3.17)3d( 0.01)4p( 0.01)          |
| H  | 12 | 1S( 0.81)                                           |
| H  | 13 | 1S( 0.82)                                           |
| C  | 14 | [core]2S( 0.97)2p( 3.18)3d( 0.01)4p( 0.01)          |
| H  | 15 | 1S( 0.81)                                           |
| H  | 16 | 1S( 0.82)                                           |
| N  | 17 | [core]2S( 1.32)2p( 4.31)3d( 0.01)4p( 0.01)          |
| C  | 18 | [core]2S( 1.01)2p( 3.30)3d( 0.01)4p( 0.01)          |
| H  | 19 | 1S( 0.84)                                           |
| H  | 20 | 1S( 0.78)                                           |
| H  | 21 | 1S( 0.82)                                           |
| C  | 22 | [core]2S( 1.01)2p( 3.30)3d( 0.01)4p( 0.01)          |
| H  | 23 | 1S( 0.82)                                           |
| H  | 24 | 1S( 0.79)                                           |
| H  | 25 | 1S( 0.84)                                           |
| C  | 26 | [core]2S( 0.88)2p( 3.07)3p( 0.01)3d( 0.01)4p( 0.01) |
| C  | 27 | [core]2S( 0.92)2p( 3.60)4p( 0.03)                   |
| H  | 28 | 1S( 0.82)                                           |
| C  | 29 | [core]2S( 0.92)2p( 3.32)3d( 0.01)4p( 0.02)          |
| H  | 30 | 1S( 0.82)                                           |
| C  | 31 | [core]2S( 0.93)2p( 3.34)3d( 0.01)4p( 0.02)          |
| H  | 32 | 1S( 0.82)                                           |
| C  | 33 | [core]2S( 0.91)2p( 3.59)4p( 0.03)                   |
| H  | 34 | 1S( 0.82)                                           |
| Li | 35 | [core]2S( 0.08)3d( 0.01)4p( 0.01)                   |
| N  | 36 | [core]2S( 1.32)2p( 4.31)3d( 0.01)4p( 0.02)          |
| C  | 37 | [core]2S( 1.01)2p( 3.30)3d( 0.01)4p( 0.01)          |
| H  | 38 | 1S( 0.80)                                           |
| H  | 39 | 1S( 0.81)                                           |
| H  | 40 | 1S( 0.83)                                           |
| C  | 41 | [core]2S( 1.01)2p( 3.30)3d( 0.01)4p( 0.01)          |
| H  | 42 | 1S( 0.84)                                           |
| H  | 43 | 1S( 0.81)                                           |
| H  | 44 | 1S( 0.80)                                           |
| C  | 45 | [core]2S( 0.97)2p( 3.17)3d( 0.01)4p( 0.01)          |
| H  | 46 | 1S( 0.81)                                           |
| H  | 47 | 1S( 0.82)                                           |
| C  | 48 | [core]2S( 0.97)2p( 3.18)3d( 0.01)4p( 0.01)          |
| H  | 49 | 1S( 0.81)                                           |
| H  | 50 | 1S( 0.82)                                           |

# Supplementary Material (ESI) for Dalton Transactions  
# This journal is (c) The Royal Society of Chemistry 2009

|   |    |                                                     |
|---|----|-----------------------------------------------------|
| N | 51 | [core]2S( 1.32)2p( 4.31)3d( 0.01)4p( 0.01)          |
| C | 52 | [core]2S( 1.01)2p( 3.30)3d( 0.01)4p( 0.01)          |
| H | 53 | 1S( 0.84)                                           |
| H | 54 | 1S( 0.78)                                           |
| H | 55 | 1S( 0.82)                                           |
| C | 56 | [core]2S( 1.01)2p( 3.30)3d( 0.01)4p( 0.01)          |
| H | 57 | 1S( 0.82)                                           |
| H | 58 | 1S( 0.79)                                           |
| H | 59 | 1S( 0.84)                                           |
| C | 60 | [core]2S( 0.88)2p( 3.07)3p( 0.01)3d( 0.01)4p( 0.01) |
| C | 61 | [core]2S( 0.92)2p( 3.60)4p( 0.03)                   |
| H | 62 | 1S( 0.82)                                           |
| C | 63 | [core]2S( 0.92)2p( 3.32)3d( 0.01)4p( 0.02)          |
| H | 64 | 1S( 0.82)                                           |
| C | 65 | [core]2S( 0.93)2p( 3.34)3d( 0.01)4p( 0.02)          |
| H | 66 | 1S( 0.82)                                           |
| C | 67 | [core]2S( 0.91)2p( 3.59)4p( 0.03)                   |
| H | 68 | 1S( 0.82)                                           |

NBO analysis skipped by request.

```
1|1|UNPC-UNK|SP|RMP2-FC|6-31+G(d)|C22H40Li2N4|PCUSER|04-Sep-2008|0||#
MP2/6-31+G(D) POP=(NPA,FULL) GEOM=CONNECTIVITY SCF=TIGHT INT=ULTRAFINE
||Single point on 2||0,1|Li|N,1,2.12270033|C,2,1.45914083,1,106.5856
5173|H,3,0.95995951,2,109.48429114,1,68.73082123,0|H,3,0.95983992,2,10
9.46381677,1,-51.24253335,0|H,3,0.9599558,2,109.46704578,1,-171.287939
55,0|C,2,1.45682816,1,116.2463274,3,122.11622054,0|H,7,0.9598988,2,109
.50801728,1,178.57681344,0|H,7,0.95989617,2,109.51096754,1,58.49938321
,0|H,7,0.96072409,2,109.47331879,1,-61.4626441,0|C,2,1.46888952,1,103.
84433854,3,-117.11812327,0|H,11,0.97026537,2,109.20627609,1,-79.455592
82,0|H,11,0.9696176,2,109.20981429,1,162.70354241,0|C,11,1.50925462,2,
111.99245806,1,41.61016292,0|H,14,0.96983329,11,109.3762261,2,66.31398
726,0|H,14,0.96959808,11,109.33332679,2,-175.6059473,0|N,14,1.46398122
,11,111.31435947,2,-54.66821073,0|C,17,1.46335303,14,110.92203212,11,-
78.12363553,0|H,18,0.95978569,17,109.47279196,14,-59.50551931,0|H,18,0
.95977981,17,109.48180392,14,-179.5416663,0|H,18,0.96029005,17,109.479
41809,14,60.4817955,0|C,17,1.46103942,14,110.03453426,11,160.73506063,
0|H,22,0.96015783,17,109.50441192,14,-59.75591802,0|H,22,0.96025804,17
,109.43504784,14,-179.75520143,0|H,22,0.96009042,17,109.48244101,14,60
.25755645,0|C,1,2.61220359,2,145.38023704,7,-28.28046821,0|C,26,1.4214
094,1,61.86391641,2,45.90475752,0|H,27,0.93001433,26,119.40330189,1,-1
15.26467384,0|C,27,1.43412625,26,121.23354101,1,64.765803,0|H,29,0.930
47733,27,120.21669104,26,164.86645894,0|C,29,1.36284691,27,119.5281435
8,26,-15.13923495,0|H,31,0.92979605,29,120.36861049,27,-179.01672524,0
|C,31,1.43623064,29,119.32220279,27,0.9750818,0|H,33,0.92983777,31,119
.30084318,29,-166.30289302,0|Li,26,2.60978559,1,147.64074035,2,-179.47
265228,0|N,35,2.12270033,26,177.72086438,1,-7.5555009,0|C,36,1.4591408
3,35,106.58565173,26,157.51230206,0|H,37,0.95995951,36,109.48429114,35
,-68.73082123,0|H,37,0.95983992,36,109.46381677,35,51.24253335,0|H,37,
0.9599558,36,109.46704578,35,171.28793955,0|C,36,1.45682816,35,116.246
3274,26,35.39608153,0|H,41,0.9598988,36,109.50801728,35,-178.57681344,
0|H,41,0.95989617,36,109.51096754,35,-58.49938321,0|H,41,0.96072409,36
,109.47331879,35,61.4626441,0|C,36,1.46888952,35,103.84433854,26,-85.3
6957467,0|H,45,0.97026537,36,109.20627609,35,79.45559282,0|H,45,0.9696
176,36,109.20981429,35,-162.70354241,0|C,45,1.50925462,36,111.99245806
,35,-41.61016292,0|H,48,0.96983329,45,109.3762261,36,-66.31398726,0|H,
48,0.96959808,45,109.33332679,36,175.6059473,0|N,48,1.46398122,45,111.
31435947,36,54.66821073,0|C,51,1.46335303,48,110.92203212,45,78.123635
53,0|H,52,0.95978569,51,109.47279196,48,59.50551931,0|H,52,0.95977981,
51,109.48180392,48,179.5416663,0|H,52,0.96029005,51,109.47941809,48,-6
0.4817955,0|C,51,1.46103942,48,110.03453426,45,-160.73506063,0|H,56,0.
```

# Supplementary Material (ESI) for Dalton Transactions  
 # This journal is (c) The Royal Society of Chemistry 2009

```
96015783,51,109.50441192,48,59.75591802,0|H,56,0.96025804,51,109.43504
784,48,179.75520143,0|H,56,0.96009042,51,109.48244101,48,-60.25755645,
0|C,33,1.41422489,31,121.45705094,29,13.72214156,0|C,60,1.4214094,33,1
24.60599493,31,166.05829721,0|H,61,0.93001433,60,119.40330189,33,-14.4
0677309,0|C,61,1.43412625,60,121.23354101,33,165.56275007,0|H,63,0.930
47733,61,120.21669104,60,-164.86645894,0|C,63,1.36284691,61,119.528143
58,60,15.13923495,0|H,65,0.92979605,63,120.36861049,61,179.01672524,0|
C,26,1.41422489,1,136.98418615,2,-65.86723645,0|H,67,0.92983777,26,119
.24210122,1,98.16045561,0|| Version=IA32L-G03RevC.02|State=1-AG|HF=
-1088.4643129|MP2=-1092.0511851|RMSD=4.071e-009|PG=CI [X(C22H40Li2N4)]
|@
```

## 2.8. MP2/6-311++G(d)

Summary of Natural Population Analysis:

| Atom | No | Natural<br>Charge | Natural Population |         |         | Total   |
|------|----|-------------------|--------------------|---------|---------|---------|
|      |    |                   | Core               | Valence | Rydberg |         |
| Li   | 1  | 0.85740           | 1.99923            | 0.11352 | 0.02984 | 2.14260 |
| N    | 2  | -0.62353          | 1.99961            | 5.59724 | 0.02668 | 7.62353 |
| C    | 3  | -0.21726          | 1.99914            | 4.20327 | 0.01484 | 6.21726 |
| H    | 4  | 0.15723           | 0.00000            | 0.84137 | 0.00139 | 0.84277 |
| H    | 5  | 0.14618           | 0.00000            | 0.85293 | 0.00089 | 0.85382 |
| H    | 6  | 0.12817           | 0.00000            | 0.87069 | 0.00114 | 0.87183 |
| C    | 7  | -0.20751          | 1.99914            | 4.19405 | 0.01432 | 6.20751 |
| H    | 8  | 0.12517           | 0.00000            | 0.87380 | 0.00103 | 0.87483 |
| H    | 9  | 0.15115           | 0.00000            | 0.84794 | 0.00091 | 0.84885 |
| H    | 10 | 0.15481           | 0.00000            | 0.84423 | 0.00096 | 0.84519 |
| C    | 11 | -0.06829          | 1.99905            | 4.05162 | 0.01762 | 6.06829 |
| H    | 12 | 0.14603           | 0.00000            | 0.85290 | 0.00107 | 0.85397 |
| H    | 13 | 0.13006           | 0.00000            | 0.86867 | 0.00127 | 0.86994 |
| C    | 14 | -0.06857          | 1.99907            | 4.05217 | 0.01733 | 6.06857 |
| H    | 15 | 0.14101           | 0.00000            | 0.85797 | 0.00103 | 0.85899 |
| H    | 16 | 0.13431           | 0.00000            | 0.86450 | 0.00119 | 0.86569 |
| N    | 17 | -0.62734          | 1.99961            | 5.60452 | 0.02321 | 7.62734 |
| C    | 18 | -0.21855          | 1.99912            | 4.19934 | 0.02008 | 6.21855 |
| H    | 19 | 0.12445           | 0.00000            | 0.87441 | 0.00113 | 0.87555 |
| H    | 20 | 0.18228           | 0.00000            | 0.81624 | 0.00147 | 0.81772 |
| H    | 21 | 0.14337           | 0.00000            | 0.85571 | 0.00092 | 0.85663 |
| C    | 22 | -0.21056          | 1.99912            | 4.19714 | 0.01429 | 6.21056 |
| H    | 23 | 0.14160           | 0.00000            | 0.85772 | 0.00067 | 0.85840 |
| H    | 24 | 0.17590           | 0.00000            | 0.82316 | 0.00094 | 0.82410 |
| H    | 25 | 0.12287           | 0.00000            | 0.87619 | 0.00094 | 0.87713 |
| C    | 26 | 0.02215           | 1.99916            | 3.94931 | 0.02937 | 5.97785 |
| C    | 27 | -0.51898          | 1.99917            | 4.47968 | 0.04012 | 6.51898 |
| H    | 28 | 0.14728           | 0.00000            | 0.85102 | 0.00170 | 0.85272 |
| C    | 29 | -0.23856          | 1.99929            | 4.20917 | 0.03010 | 6.23856 |
| H    | 30 | 0.13864           | 0.00000            | 0.86030 | 0.00106 | 0.86136 |
| C    | 31 | -0.25851          | 1.99931            | 4.22713 | 0.03208 | 6.25851 |
| H    | 32 | 0.14052           | 0.00000            | 0.85843 | 0.00104 | 0.85948 |
| C    | 33 | -0.48934          | 1.99889            | 4.44652 | 0.04394 | 6.48934 |
| H    | 34 | 0.14494           | 0.00000            | 0.85334 | 0.00171 | 0.85506 |
| Li   | 35 | 0.85878           | 1.99923            | 0.11353 | 0.02846 | 2.14122 |
| N    | 36 | -0.62340          | 1.99961            | 5.59726 | 0.02653 | 7.62340 |
| C    | 37 | -0.21724          | 1.99914            | 4.20326 | 0.01483 | 6.21724 |
| H    | 38 | 0.15724           | 0.00000            | 0.84137 | 0.00139 | 0.84276 |

# Supplementary Material (ESI) for Dalton Transactions  
 # This journal is (c) The Royal Society of Chemistry 2009

|           |    |          |          |           |         |           |
|-----------|----|----------|----------|-----------|---------|-----------|
| H         | 39 | 0.14619  | 0.00000  | 0.85293   | 0.00089 | 0.85381   |
| H         | 40 | 0.12817  | 0.00000  | 0.87069   | 0.00114 | 0.87183   |
| C         | 41 | -0.20751 | 1.99914  | 4.19405   | 0.01432 | 6.20751   |
| H         | 42 | 0.12517  | 0.00000  | 0.87380   | 0.00103 | 0.87483   |
| H         | 43 | 0.15115  | 0.00000  | 0.84794   | 0.00091 | 0.84885   |
| H         | 44 | 0.15482  | 0.00000  | 0.84423   | 0.00095 | 0.84518   |
| C         | 45 | -0.06829 | 1.99905  | 4.05163   | 0.01761 | 6.06829   |
| H         | 46 | 0.14603  | 0.00000  | 0.85290   | 0.00107 | 0.85397   |
| H         | 47 | 0.13006  | 0.00000  | 0.86867   | 0.00127 | 0.86994   |
| C         | 48 | -0.06856 | 1.99907  | 4.05217   | 0.01732 | 6.06856   |
| H         | 49 | 0.14101  | 0.00000  | 0.85797   | 0.00103 | 0.85899   |
| H         | 50 | 0.13431  | 0.00000  | 0.86450   | 0.00119 | 0.86569   |
| N         | 51 | -0.62730 | 1.99961  | 5.60450   | 0.02320 | 7.62730   |
| C         | 52 | -0.21851 | 1.99912  | 4.19935   | 0.02005 | 6.21851   |
| H         | 53 | 0.12445  | 0.00000  | 0.87441   | 0.00114 | 0.87555   |
| H         | 54 | 0.18229  | 0.00000  | 0.81625   | 0.00145 | 0.81771   |
| H         | 55 | 0.14337  | 0.00000  | 0.85570   | 0.00092 | 0.85663   |
| C         | 56 | -0.21055 | 1.99912  | 4.19714   | 0.01429 | 6.21055   |
| H         | 57 | 0.14160  | 0.00000  | 0.85772   | 0.00067 | 0.85840   |
| H         | 58 | 0.17591  | 0.00000  | 0.82316   | 0.00093 | 0.82409   |
| H         | 59 | 0.12287  | 0.00000  | 0.87619   | 0.00094 | 0.87713   |
| C         | 60 | 0.01403  | 1.99918  | 3.95725   | 0.02954 | 5.98597   |
| C         | 61 | -0.51921 | 1.99917  | 4.47984   | 0.04019 | 6.51921   |
| H         | 62 | 0.14733  | 0.00000  | 0.85099   | 0.00168 | 0.85267   |
| C         | 63 | -0.23870 | 1.99929  | 4.20916   | 0.03025 | 6.23870   |
| H         | 64 | 0.13867  | 0.00000  | 0.86029   | 0.00104 | 0.86133   |
| C         | 65 | -0.25392 | 1.99929  | 4.22296   | 0.03167 | 6.25392   |
| H         | 66 | 0.14055  | 0.00000  | 0.85844   | 0.00102 | 0.85945   |
| C         | 67 | -0.50592 | 1.99916  | 4.46310   | 0.04366 | 6.50592   |
| H         | 68 | 0.14658  | 0.00000  | 0.85181   | 0.00161 | 0.85342   |
| =====     |    |          |          |           |         |           |
| * Total * |    | 0.00000  | 55.97813 | 149.27140 | 0.75046 | 206.00000 |

Natural Population

|                       |           |                    |
|-----------------------|-----------|--------------------|
| Core                  | 55.97813  | ( 99.9609% of 56)  |
| Valence               | 149.27140 | ( 99.5143% of 150) |
| Natural Minimal Basis | 205.24953 | ( 99.6357% of 206) |
| Natural Rydberg Basis | 0.75046   | ( 0.3643% of 206)  |

Atom No Natural Electron Configuration

|    |    |                                            |
|----|----|--------------------------------------------|
| Li | 1  | [core]2S( 0.11)3d( 0.01)4p( 0.02)          |
| N  | 2  | [core]2S( 1.32)2p( 4.27)3p( 0.01)4p( 0.01) |
| C  | 3  | [core]2S( 0.96)2p( 3.25)3d( 0.01)4p( 0.01) |
| H  | 4  | 1S( 0.84)                                  |
| H  | 5  | 1S( 0.85)                                  |
| H  | 6  | 1S( 0.87)                                  |
| C  | 7  | [core]2S( 0.96)2p( 3.24)3d( 0.01)          |
| H  | 8  | 1S( 0.87)                                  |
| H  | 9  | 1S( 0.85)                                  |
| H  | 10 | 1S( 0.84)                                  |
| C  | 11 | [core]2S( 0.94)2p( 3.12)3p( 0.01)3d( 0.01) |
| H  | 12 | 1S( 0.85)                                  |
| H  | 13 | 1S( 0.87)                                  |
| C  | 14 | [core]2S( 0.93)2p( 3.12)3p( 0.01)3d( 0.01) |
| H  | 15 | 1S( 0.86)                                  |
| H  | 16 | 1S( 0.86)                                  |
| N  | 17 | [core]2S( 1.32)2p( 4.28)4p( 0.01)          |

# Supplementary Material (ESI) for Dalton Transactions  
# This journal is (c) The Royal Society of Chemistry 2009

```
C 18 [core]2S( 0.96)2p( 3.24)3d( 0.01)
H 19 1S( 0.87)
H 20 1S( 0.82)
H 21 1S( 0.86)
C 22 [core]2S( 0.96)2p( 3.24)3d( 0.01)
H 23 1S( 0.86)
H 24 1S( 0.82)
H 25 1S( 0.88)
C 26 [core]2S( 0.87)2p( 3.08)3d( 0.01)4p( 0.02)
C 27 [core]2S( 0.89)2p( 3.59)4p( 0.03)
H 28 1S( 0.85)
C 29 [core]2S( 0.90)2p( 3.31)3d( 0.01)4p( 0.02)
H 30 1S( 0.86)
C 31 [core]2S( 0.91)2p( 3.32)3d( 0.01)4p( 0.02)
H 32 1S( 0.86)
C 33 [core]2S( 0.87)2p( 3.57)3p( 0.01)4p( 0.03)
H 34 1S( 0.85)
Li 35 [core]2S( 0.11)3d( 0.01)4p( 0.02)
N 36 [core]2S( 1.32)2p( 4.27)3p( 0.01)4p( 0.01)
C 37 [core]2S( 0.96)2p( 3.25)3d( 0.01)4p( 0.01)
H 38 1S( 0.84)
H 39 1S( 0.85)
H 40 1S( 0.87)
C 41 [core]2S( 0.96)2p( 3.24)3d( 0.01)
H 42 1S( 0.87)
H 43 1S( 0.85)
H 44 1S( 0.84)
C 45 [core]2S( 0.94)2p( 3.12)3p( 0.01)3d( 0.01)
H 46 1S( 0.85)
H 47 1S( 0.87)
C 48 [core]2S( 0.93)2p( 3.12)3p( 0.01)3d( 0.01)
H 49 1S( 0.86)
H 50 1S( 0.86)
N 51 [core]2S( 1.32)2p( 4.28)4p( 0.01)
C 52 [core]2S( 0.96)2p( 3.24)3d( 0.01)
H 53 1S( 0.87)
H 54 1S( 0.82)
H 55 1S( 0.86)
C 56 [core]2S( 0.96)2p( 3.24)3d( 0.01)
H 57 1S( 0.86)
H 58 1S( 0.82)
H 59 1S( 0.88)
C 60 [core]2S( 0.88)2p( 3.08)3d( 0.01)4p( 0.02)
C 61 [core]2S( 0.89)2p( 3.59)4p( 0.03)
H 62 1S( 0.85)
C 63 [core]2S( 0.90)2p( 3.31)3d( 0.01)4p( 0.02)
H 64 1S( 0.86)
C 65 [core]2S( 0.90)2p( 3.32)3d( 0.01)4p( 0.02)
H 66 1S( 0.86)
C 67 [core]2S( 0.89)2p( 3.57)3p( 0.01)4p( 0.03)
H 68 1S( 0.85)
```

NBO analysis skipped by request.

```
1|1|UNPC-UNK|SP|RMP2-FC|6-311++G(d)|C22H40Li2N4|PCUSER|06-Sep-2008|0||
# MP2/6-311++G(D) POP=(NPA,FULL) GEOM=CONNECTIVITY SCF=TIGHT INT=ULTRA
FINE||Single point on 2||0,1|Li|N,1,2.12270033|C,2,1.45914083,1,106.
58565173|H,3,0.95995951,2,109.48429114,1,68.73082123,0|H,3,0.95983992,
2,109.46381677,1,-51.24253335,0|H,3,0.9599558,2,109.46704578,1,-171.28
793955,0|C,2,1.45682816,1,116.2463274,3,122.11622054,0|H,7,0.9598988,2
,109.50801728,1,178.57681344,0|H,7,0.95989617,2,109.51096754,1,58.4993
```



8321, 0 | H, 7, 0.96072409, 2, 109.47331879, 1, -61.4626441, 0 | C, 2, 1.46888952, 1, 103.84433854, 3, -117.11812327, 0 | H, 11, 0.97026537, 2, 109.20627609, 1, -79.4559282, 0 | H, 11, 0.9696176, 2, 109.20981429, 1, 162.70354241, 0 | C, 11, 1.50925462, 2, 111.99245806, 1, 41.61016292, 0 | H, 14, 0.96983329, 11, 109.3762261, 2, 66.31398726, 0 | H, 14, 0.96959808, 11, 109.33332679, 2, -175.6059473, 0 | N, 14, 1.46398122, 11, 111.31435947, 2, -54.66821073, 0 | C, 17, 1.46335303, 14, 110.92203212, 11, -78.12363553, 0 | H, 18, 0.95978569, 17, 109.47279196, 14, -59.50551931, 0 | H, 18, 0.95977981, 17, 109.48180392, 14, -179.5416663, 0 | H, 18, 0.96029005, 17, 109.47941809, 14, 60.4817955, 0 | C, 17, 1.46103942, 14, 110.03453426, 11, 160.73506063, 0 | H, 22, 0.96015783, 17, 109.50441192, 14, -59.75591802, 0 | H, 22, 0.96025804, 17, 109.43504784, 14, -179.75520143, 0 | H, 22, 0.96009042, 17, 109.48244101, 14, 60.25755645, 0 | C, 1, 2.61220359, 2, 145.38023704, 7, -28.28046821, 0 | C, 26, 1.4214094, 1, 61.86391641, 2, 45.90475752, 0 | H, 27, 0.93001433, 26, 119.40330189, 1, -115.26467384, 0 | C, 27, 1.43412625, 26, 121.23354101, 1, 64.765803, 0 | H, 29, 0.93047733, 27, 120.21669104, 26, 164.86645894, 0 | C, 29, 1.36284691, 27, 119.52814358, 26, -15.13923495, 0 | H, 31, 0.92979605, 29, 120.36861049, 27, -179.01672524, 0 | C, 31, 1.43623064, 29, 119.32220279, 27, 0.9750818, 0 | H, 33, 0.92983777, 31, 119.30084318, 29, -166.30289302, 0 | Li, 26, 2.60978559, 1, 147.64074035, 2, -179.47265228, 0 | N, 35, 2.12270033, 26, 177.72086438, 1, -7.5555009, 0 | C, 36, 1.45914083, 35, 106.58565173, 26, 157.51230206, 0 | H, 37, 0.95995951, 36, 109.48429114, 35, -68.73082123, 0 | H, 37, 0.95983992, 36, 109.46381677, 35, 51.24253335, 0 | H, 37, 0.9599558, 36, 109.46704578, 35, 171.28793955, 0 | C, 36, 1.45682816, 35, 116.2463274, 26, 35.39608153, 0 | H, 41, 0.9598988, 36, 109.50801728, 35, -178.57681344, 0 | H, 41, 0.95989617, 36, 109.51096754, 35, -58.49938321, 0 | H, 41, 0.96072409, 36, 109.47331879, 35, 61.4626441, 0 | C, 36, 1.46888952, 35, 103.84433854, 26, -85.36957467, 0 | H, 45, 0.97026537, 36, 109.20627609, 35, 79.45559282, 0 | H, 45, 0.9696176, 36, 109.20981429, 35, -162.70354241, 0 | C, 45, 1.50925462, 36, 111.99245806, 35, -41.61016292, 0 | H, 48, 0.96983329, 45, 109.3762261, 36, -66.31398726, 0 | H, 48, 0.96959808, 45, 109.33332679, 36, 175.6059473, 0 | N, 48, 1.46398122, 45, 111.31435947, 36, 54.66821073, 0 | C, 51, 1.46335303, 48, 110.92203212, 45, 78.12363553, 0 | H, 52, 0.95978569, 51, 109.47279196, 48, 59.50551931, 0 | H, 52, 0.95977981, 51, 109.48180392, 48, 179.5416663, 0 | H, 52, 0.96029005, 51, 109.47941809, 48, -60.4817955, 0 | C, 51, 1.46103942, 48, 110.03453426, 45, -160.73506063, 0 | H, 56, 0.96015783, 51, 109.50441192, 48, 59.75591802, 0 | H, 56, 0.96025804, 51, 109.43504784, 48, 179.75520143, 0 | H, 56, 0.96009042, 51, 109.48244101, 48, -60.25755645, 0 | C, 33, 1.41422489, 31, 121.45705094, 29, 13.72214156, 0 | C, 60, 1.4214094, 33, 124.60599493, 31, 166.05829721, 0 | H, 61, 0.93001433, 60, 119.40330189, 33, -14.40677309, 0 | C, 61, 1.43412625, 60, 121.23354101, 33, 165.56275007, 0 | H, 63, 0.93047733, 61, 120.21669104, 60, -164.86645894, 0 | C, 63, 1.36284691, 61, 119.52814358, 60, 15.13923495, 0 | H, 65, 0.92979605, 63, 120.36861049, 61, 179.01672524, 0 | C, 26, 1.41422489, 1, 136.98418615, 2, -65.86723645, 0 | H, 67, 0.92983777, 26, 119.24210122, 1, 98.16045561, 0 | | Version=IA32L-G03RevC.02 | State=1-AG | HF=-1088.6709503 | MP2=-1092.4439169 | RMSD=7.334e-009 | PG=CI [X(C22H40Li2N4)] | | @

### 3. References

- 
- <sup>1</sup> *SAINTE* version 6.02A: *Area-Detector Integration Software*; Siemens Industrial Automation Inc.: Madison, WI, 1995.
- <sup>2</sup> Sheldrick, G. M. *SADABS: Area-Detector Absorption Correction*; Göttingen University: Göttingen, Germany, 1996.
- <sup>3</sup> *SHELX97* [Includes *SHELXS97*, *SHELXL97* and *CIFTAB*]—*Programs for Crystal Structure Analysis* (Release 97-2). Sheldrick, G. M., Institut für Anorganische Chemie der Universität: Tammanstrasse 4, D-3400 Göttingen, Germany, 1998.
- <sup>4</sup> Gaussian 03, Revision C.02, M. J. Frisch, G. W. Trucks, H. B. Schlegel, G. E. Scuseria, M. A. Robb, J. R. Cheeseman, J. A. Montgomery, Jr., T. Vreven, K. N. Kudin, J. C. Burant, J. M. Millam, S. S. Iyengar, J. Tomasi,

V. Barone, B. Mennucci, M. Cossi, G. Scalmani, N. Rega, G. A. Petersson, H. Nakatsuji, M. Hada, M. Ehara, K. Toyota, R. Fukuda, J. Hasegawa, M. Ishida, T. Nakajima, Y. Honda, O. Kitao, H. Nakai, M. Klene, X. Li, J. E. Knox, H. P. Hratchian, J. B. Cross, C. Adamo, J. Jaramillo, R. Gomperts, R. E. Stratmann, O. Yazyev, A. J. Austin, R. Cammi, C. Pomelli, J. W. Ochterski, P. Y. Ayala, K. Morokuma, G. A. Voth, P. Salvador, J. J. Dannenberg, V. G. Zakrzewski, S. Dapprich, A. D. Daniels, M. C. Strain, O. Farkas, D. K. Malick, A. D. Rabuck, K. Raghavachari, J. B. Foresman, J. V. Ortiz, Q. Cui, A. G. Baboul, S. Clifford, J. Cioslowski, B. B. Stefanov, G. Liu, A. Liashenko, P. Piskorz, I. Komaromi, R. L. Martin, D. J. Fox, T. Keith, M. A. Al-Laham, C. Y. Peng, A. Nanayakkara, M. Challacombe, P. M. W. Gill, B. Johnson, W. Chen, M. W. Wong, C. Gonzalez, and J. A. Pople, Gaussian, Inc., Wallingford CT, 2004.

<sup>5</sup> a) P. Hohenberg, W. Kohn, *Phys. Rev.* **1964**, *136*, B864–871; b) W. Kohn, L. J. Sham, *Phys. Rev.* **1965**, *140*, A1133–1138.

<sup>6</sup> a) A.D. Becke, *J. Chem. Phys.* **1993**, *98*, 5648–5652; b) P. J. Stephens, F. J. Devlin, C. F. Chabrowski, M. J. Frisch, *J. Phys. Chem.* **1994**, *98*, 11623–11627.

<sup>7</sup> M. Head-Gordon, J. A. Pople, M. J. Frisch, *Chem. Phys. Lett.* **1988**, *153*, 503.

<sup>8</sup> a) R. Krishnan, J. S. Binkley, R. Seeger, J. A. Pople, *J. Chem. Phys.* **1980**, *72*, 650–654. b) T. H. Dunning Jr., P. J. Hay, in *Modern Theoretical Chemistry*, Ed. H. F. Schaefer III, Vol. 3, Plenum, New York, 1976, 1–28.

<sup>9</sup> a) A. E. Reed, F. Weinhold, *J. Chem. Phys.* **1983**, *78*, 4066–4073. b) A. E. Reed, R. B. Weinstock, F. Weinhold, *J. Chem. Phys.* **1985**, *83*, 735–746.
